# Supplementary material for: Food addiction and the physical and mental health status of adults with overweight and obesity
Source: PeerJ. 2024 Jun 28;12:e17639. doi: 10.7717/peerj.17639 (PMC11216192; doi:10.7717/peerj.17639)
Supplement: Supplemental Information 2 — The responses to the individual questionnaires. [file peerj-12-17639-s002.xlsx]

## Sheet: All data and FFQ
Number/Questions	Gender (1-female, 2-male)	Age	Education (1-Primary, 2-Lower Secondary, 3-Vocational, 4-Secondary, 5-Higher)	Place of residence (1-Village, 2-City)	1. Metabolic diseases (Yes-1, No-2)	2. Cardiovascular diseases (Yes-1, No-2)	3. Thyroid diseases (Yes-1, No-2)	4. Diseases of the nervous system (Yes-1, No-2)	5. Respiratory diseases (Yes-1, No-2)	6. Diseases of the digestive system (Yes-1, No-2)	7. Eating disorders - anorexia and other (Yes-1, No-2)	8. Eating disorders - bulimia (Yes-1, No-2)	9. Binge Eating Disorder (BED) (Yes-1, No-2)	10. Cancer Diseases (Yes-1, No-2)	11. Osteoarticular diseases (Yes-1, No-2)	12. Not applicable (Yes-1, No-2)	On average, how many hours a day do you spend sleeping on weekdays? (6 or less h/day(1), 7-8 h/day(2), 9 or more h/day(3))	On average, how many hours a day do you spend sleeping on weekend days? (6 or less hrs/day(1), 7-8 hrs/day(2), 9 or more hrs/day(3))	Do you currently smoke cigarettes, a pipe or other tobacco? (Yes-1, No-2)	Do you have a job? (1) No, I am retired (2) No, I am on parental leave, unemployed, homemaker (3) Yes, but I work occasionally (4) Yes, I have a permanent job (5) No, I am in education or studying	If you are working, please indicate your current form of employment (0-not working, 1-working)	Total alcohol consumption: "Several times a month or less often-1"; "Several times a week or more often-2".	Body composition analysis:	Body weight	Height	BMI	WHO BMI classification (1-normal weight, 2-overweight, 3-obesity I class, 4-obesity II class, 5-obesity III class).	FAT (%)	FFM (kg)	Visceral fat	Circumferences and WHR:	Waist circumference (cm)	Hip circumference (cm)	WHR	Blood pressure:	Arterial pressure SBP (average of 3 measurements)	Blood pressure DBP (average of 3 measurements)	Glucose and lipid profile:	Total Cholesterol	LDL	HDL	TG	Glucose	FFQ:	SWEETS AND FOODS (1-Never or hardly ever, 2-Once a month or less often, 3-Sometimes a month, 4-Sometimes a week, 5-Daily, 6-Sometimes a day)	5. sugar for sweetening drinks	6. honey for food and drink sweetening	7. chocolates, chocolate candies and chocolate bars	8. non-chocolate candies, e.g. fruit candies, caramels, jelly beans, fudge, toffees
1	1	70	5	2	1	2	1	2	2	2	2	2	2	2	2	2	2	2	2	1	0	1		73.4	160.2	28.6003	2	33.6	48.7	10		82.5	96.5	0.854922		95	61		230	153	64	62	98			5	5	5	4
2	1	62	5	2	1	1	2	2	2	2	2	2	2	2	2	2	2	2	2	4	1	1		74.4	159.067	29.4046	2	38.4	45.9	10		90	102.5	0.878049		119	74		227	122	62	213	156			1	1	3	2
3	1	64	3	1	2	2	2	2	2	2	2	2	2	2	2	1	2	2	2	3	1	1		74.6	155.9	30.6935	3	40.7	44.2	11		101	115	0.878261		130	85		270	146	94	150	126			1	4	5	6
4	1	79	4	2	2	2	2	2	2	2	2	2	2	2	2	1	2	2	2	1	0	1		81.5	156.9	33.1064	3	45.2	44.7	14		104	108	0.962963		127	58		236	144	42	251	112			1	4	3	1
5	1	69	4	2	2	2	1	2	2	1	2	2	2	2	2	2	2	2	2	1	0	1		76.5	163.067	28.7694	2	42.5	44	11		93.5	106	0.882075		111	74		196	94	79	112	124			4	4	4	5
6	2	63	5	2	1	1	2	2	2	2	2	2	2	2	2	2	2	2	2	4	1	1		73.5	165.1	26.9646	2	26.7	53.9	14		95	104.5	0.909091		131	77		163	80	45	191	104			1	2	3	1
7	2	64	5	2	2	1	2	2	2	2	2	2	2	2	2	2	2	3	2	4	1	2		94	174.967	30.7056	3	30.1	65.7	17		107	112	0.955357		128	79		146	66	48	161	120			2	2	3	3
8	1	52	5	1	1	2	2	2	2	2	2	2	2	2	2	2	2	2	2	4	1	1		85.6	155.133	35.5683	4	40.3	51.1	11		97.5	111	0.878378		126	72		216	129	51	179	109			1	4	4	1
9	1	61	5	2	2	1	2	2	2	1	2	2	2	2	2	2	2	2	2	1	0	1		87.2	161.067	33.6128	3	41.8	50.8	12		99	114	0.868421		131	76		193	110	62	102	105			3	4	3	3
10	1	28	5	2	2	2	2	2	2	2	2	2	2	2	2	1	1	2	2	4	1	1		89	180.9	27.1965	2	37.5	55.7	5		82.5	117	0.705128		112	64		137	73	50	71	97			2	2	5	3
11	1	59	5	2	2	2	2	2	2	2	2	2	2	2	2	1	1	2	1	4	1	1		83.9	161.067	32.3408	3	44.9	46.2	12		98	108.5	0.903226		123	74		209	134	36	199	104			1	4	3	1
12	1	53	5	2	2	2	2	2	2	2	2	2	2	2	2	1	1	2	2	4	1	1		96	162.033	36.5647	4	42.6	55.1	12		102	121	0.842975		125	82		220	130	52	194	105			1	1	5	1
13	1	65	4	2	2	2	2	2	2	2	2	2	2	2	2	1	2	2	2	1	0	1		90.5	160	35.3516	4	45	49.8	14		103	115	0.895652		134	84		241	151	77	65	107			1	1	4	1
14	1	47	5	2	2	2	2	2	2	2	2	2	2	2	2	1	1	1	2	4	1	2		72	163	27.0993	2	35.5	46.5	7		80.5	105	0.766667		101	65		172	80	77	71	88			2	5	2	1
15	1	73	5	1	1	1	2	2	2	2	2	2	2	2	2	2	2	2	1	1	0	1		87.9	158.1	35.1662	4	39.8	52.9	13		90	103.5	0.869565		123	72		160	92	42	129	95			1	1	2	1
16	1	50	3	1	2	2	2	2	2	1	2	2	2	2	2	2	2	2	2	4	1	1		70.3	158.8	27.8775	2	36.3	44.8	8		94.75	105.75	0.895981		128	78		222	129	61	158	91			5	1	1	1
17	1	57	5	2	2	2	2	2	2	1	2	2	1	2	2	2	1	2	2	4	1	1		89.6	166.833	32.1916	3	41.2	52.7	11		96.75	120	0.80625		107	68		191	123	49	94	100			1	4	4	3
18	2	62	5	2	2	1	2	2	1	2	2	2	2	2	2	2	1	2	2	4	1	1		80.6	174.033	26.6115	2	28.8	57.4	14		102.5	96	1.06771		116	73		120	73	27	75	108			5	1	3	3
19	1	51	5	1	2	2	2	2	1	2	2	2	2	2	2	2	1	2	2	4	1	1		80.1	163.067	30.1233	3	40.4	47.8	9		94	108	0.87037		110	67		170	91	62	88	88			1	3	4	4
20	1	44	5	2	2	2	2	2	1	2	2	2	2	2	2	2	2	2	2	4	1	1		84.1	158.9	33.308	3	41.8	48.9	10		93.5	112	0.834821		102	70		299	203	83	66	82			6	4	3	3
21	2	40	5	2	2	1	2	2	2	2	2	2	2	2	2	2	2	2	2	4	1	2		125.1	173.067	41.7667	5	36.8	79.1	21		127.5	112	1.13839		131	81		197	140	30	113	92			5	2	4	1
22	2	32	5	2	2	2	2	2	2	2	2	2	2	2	2	1	2	2	1	4	1	1		93.1	177	29.7169	2	26.1	68.8	9		98.5	104	0.947115		116	83		195	110	52	98	108			6	3	6	2
23	1	73	4	1	2	2	1	2	1	2	2	2	2	2	2	2	3	3	1	1	0	2		85.7	149.033	38.5846	4	47.4	45.1	16		105.5	108	0.976852		136	83		162	89	44	148	106			5	4	4	5
24	1	29	2	1	2	2	2	2	2	2	2	2	2	2	2	1	1	1	2	3	1	2		118.8	157.967	47.6086	5	53.1	55.7	16		122.5	149	0.822148		131	87		117	40	38	192	98			5	2	4	4
25	1	48	5	1	2	2	2	2	2	2	2	2	2	2	2	1	1	1	2	3	1	1		82.9	162.833	31.2657	3	38.5	51	9		102	112	0.910714		95	62		179	84	78	83	138			4	2	4	4
26	1	65	5	2	2	1	2	2	2	2	2	2	2	2	2	2	2	2	2	4	1	1		69.4	160	27.1094	2	36.6	44	9		82	105	0.780952		105	67		257	165	45	235	105			1	5	2	2
27	1	70	5	2	2	1	2	2	2	2	2	2	2	2	2	2	1	2	2	1	0	1		75.4	156.933	30.6155	3	42	43.7	12		91	104	0.875		114	72		173	89	62	110	113			1	2	3	3
28	1	69	5	2	2	2	1	2	2	1	2	2	2	2	2	2	1	3	2	1	0	1		71.8	167.967	25.4494	2	38.5	44.2	10		83.5	103.5	0.806763		100	77		181	88	68	127	102			1	4	3	1
29	1	72	5	2	2	1	2	2	2	2	2	2	2	2	2	2	2	2	2	1	0	1		77.7	165.933	28.2198	2	35.3	50.2	10		90.5	104.5	0.866029		104	54		158	81	61	82	88			1	3	4	2
30	1	56	5	2	2	1	2	2	2	1	2	2	2	2	2	2	2	2	2	4	1	1		119.6	159	47.3083	5	53.9	55.2	19		125	139	0.899281		129	84		346	244	53	248	127			1	4	1	1
31	1	55	5	1	2	1	2	2	2	2	2	2	2	2	2	2	1	1	2	4	1	1		81.9	162.767	30.9138	3	43.7	46.1	11		89	115.5	0.770563		109	76		258	172	58	140	102			1	3	3	3
32	1	55	5	2	2	2	2	2	2	2	2	2	2	2	2	1	1	2	2	4	1	1		87.3	153.067	37.2609	4	47.5	45.8	14		101	119	0.848739		129	80		202	128	45	146	154			1	1	5	2
33	1	68	3	2	2	1	2	2	2	2	2	2	2	2	2	2	2	3	2	1	0	1		83.4	160	32.5781	3	40.8	49.3	12		89	111.5	0.798206		148	86		164	72	72	103	109			4	5	4	4
34	1	60	5	2	2	1	1	2	2	2	2	2	2	2	2	2	2	2	2	4	1	1		86.9	163.133	32.6538	3	45.3	47.6	12		94.5	115	0.821739		118	77		170	107	43	101	91			4	4	2	1
35	1	53	5	2	2	2	2	2	2	2	2	2	2	2	2	1	2	3	2	4	1	1		67	159.133	26.4577	2	34.3	44	7		81	104.5	0.77512		103	62		205	102	91	60	96			1	2	3	3
36	1	73	5	2	1	2	1	2	2	1	2	2	2	2	1	2	1	1	2	1	0	1		69.6	157.833	27.9391	2	35.3	45	10		97	104.5	0.92823		120	78		179	100	49	152	94			2	1	3	4
37	2	76	5	2	2	1	2	2	2	2	2	2	2	2	2	2	2	2	2	1	0	1		72.8	168.933	25.5094	2	18.8	59.1	13		94	101	0.930693		115	63		189	120	49	103	154			5	3	3	4
38	1	65	5	2	2	1	2	2	2	2	2	2	2	2	2	2	2	2	2	1	0	1		86.8	170.1	29.9993	3	38	53.9	10		105.5	112.5	0.937778		124	72		120	60	50	164	97			3	4	2	2
39	1	66	4	2	2	1	2	2	2	1	2	2	2	2	2	2	2	2	2	1	0	2		109.1	163.133	40.9958	5	40.4	65	14		125.5	135.5	0.926199		117	68		135	47	43	223	107			1	5	3	1
40	1	49	5	2	2	2	1	2	2	2	2	2	2	2	2	2	2	3	2	4	1	1		103.8	173.133	34.6287	3	40.6	61.7	10		118	124	0.951613		106	75		168	96	40	159	95			5	1	4	1
41	1	50	4	2	2	1	1	2	2	2	2	2	2	2	2	2	2	3	2	4	1	1		90	175.133	29.343	2	28.4	64.4	6		101	115	0.878261		122	81		182	93	69	96	93			1	4	3	2
42	1	44	5	2	2	2	1	2	2	2	2	2	2	2	2	2	1	3	2	4	1	1		87.7	163.067	32.9814	3	45.1	48.1	10		104	125	0.832		94	65		180	102	62	82	99			2	2	4	2
43	1	59	5	1	2	1	2	2	2	2	2	2	1	2	2	2	3	3	2	4	1	1		84.8	162.067	32.2856	3	44.3	47.3	12		110.5	110.5	1		100	69		180	81	58	123	117			5	4	4	4
44	2	51	5	2	2	1	2	2	2	2	2	2	2	2	2	2	2	2	2	4	1	2		129.7	180.067	40.0012	5	36.2	82.8	22		132	129.5	1.01931		121	65		139	74	34	154	116			1	1	3	2
45	2	53	5	2	2	1	2	2	2	2	2	2	2	2	2	2	2	2	2	4	1	2		105.7	181.033	32.2521	3	31.9	72	16		114.5	111.5	1.02691		119	78		143	80	34	144	183			1	1	5	5
46	2	50	5	2	1	1	2	2	1	2	2	2	2	2	2	2	1	3	1	4	1	2		130	175.167	42.3682	5	36.2	82.8	22		97.5	100	0.975		119	80		232	162	44	129	107			5	4	6	4
47	1	43	5	2	1	2	1	2	2	2	2	2	2	2	2	2	2	3	2	4	1	2		92.6	171.067	31.6432	3	46.6	49.5	10		94.5	125	0.756		112	72		183	101	57	123	108			3	4	2	2
48	1	73	5	2	1	1	1	2	2	2	2	2	2	2	1	2	2	2	2	3	1	1		78.8	163.2	29.586	2	42.2	45.5	12		97.5	113	0.862832		125	74		238	157	65	79	105			4	1	3	3
49	1	48	5	2	2	2	1	2	2	2	2	2	2	2	2	2	2	2	2	4	1	1		86.1	169.2	30.0748	3	42.8	49.3	9		96	113	0.849558		125	82		247	169	40	192	99			1	2	3	1
50	1	50	5	2	2	2	2	2	2	2	2	2	2	2	2	1	1	2	2	4	1	1		74	159.133	29.222	2	41	43.7	9		94.5	105	0.9		135	89		117	60	37	99	118			3	6	4	2
51	1	52	4	2	2	1	1	2	2	2	2	2	2	2	2	2	2	2	2	4	1	1		96.7	170.833	33.1346	3	39	59	10		101.5	114	0.890351		130	70		242	155	47	197	108			1	2	3	1
52	1	60	4	2	2	1	2	2	2	2	2	2	2	2	2	2	1	2	2	4	1	1		85.9	159.267	33.8644	3	42.9	49.1	12		95.5	117.5	0.812766		132	78		144	43	52	90	86			1	1	4	5
53	1	45	5	2	2	2	2	2	1	2	2	2	2	2	2	2	2	2	2	4	1	1		115.9	169.233	40.468	5	52.1	55.5	15		132.5	122	1.08607		126	75		207	131	42	170	90			1	3	4	1
54	1	63	5	2	2	2	2	2	2	2	2	2	2	2	2	1	2	2	2	1	0	1		84.8	157.167	34.3301	3	40.6	50.4	12		101	126	0.801587		148	86		184	109	58	85	89			4	3	4	4
55	2	58	5	2	1	1	2	2	2	2	2	2	2	2	2	2	1	1	2	4	1	1		86.1	172.067	29.081	2	22.8	66.5	12		102	100	1.02		137	83		166	98	40	140	121			2	3	3	2
56	1	64	5	2	1	1	1	2	2	2	2	2	2	2	2	2	2	2	2	1	0	1		93	160.067	36.2979	4	44.3	51.8	14		103.5	121.5	0.851852		144	79		209	120	61	141	97			2	2	3	3
57	1	42	5	2	2	2	1	2	2	2	2	2	1	2	2	2	2	2	1	4	1	1		99.9	170.233	34.4728	3	41.7	58.2	10		97.5	120.5	0.809129		116	76		150	88	38	120	97			1	3	6	3
58	1	36	4	2	2	2	2	2	1	2	2	2	2	2	2	2	1	3	2	4	1	1		107.9	161.167	41.5404	5	45.6	58.7	12		113	133.5	0.846442		144	95		199	121	61	83	90			1	1	4	4
59	1	72	4	2	2	2	2	2	2	2	2	2	2	2	2	1	2	2	2	1	0	1		81	159.7	31.7596	3	41.7	47.2	12		98	114.5	0.855895		145	91		149	68	52	143	100			1	1	3	3
60	1	60	4	2	2	2	2	2	2	2	2	2	2	2	2	1	2	2	2	1	0	1		71.7	160.067	27.9845	2	33.2	47.9	8		82	105.5	0.777251		110	76		214	112	83	94	100			1	4	3	1
61	1	54	5	2	2	1	2	2	2	2	2	2	2	2	2	2	2	2	2	4	1	1		89.1	160	34.8047	3	41.9	51.7	11		101	115.5	0.874459		136	83		135	66	41	138	100			1	1	2	1
62	1	53	4	2	2	1	1	2	2	1	2	2	2	2	2	2	1	2	2	4	1	1		92.5	162.133	35.1882	4	44.5	51.3	12		101.5	123.5	0.821862		127	77		213	131	36	234	106			1	1	4	3
63	1	60	5	2	1	1	1	2	2	2	2	2	2	2	2	2	1	1	2	1	0	2		90.1	149	40.5838	5	45.4	49.2	15		108	126.5	0.853755		148	80		183	113	32	189	153			1	5	5	4
64	1	79	5	2	2	2	2	2	1	1	2	2	2	2	1	2	1	1	2	1	0	1		56.9	147.2	26.2601	2	41.9	33	12		91.5	101.5	0.901478		128	76		182	98	66	89	113			1	3	3	2
65	1	59	5	2	2	2	2	2	2	2	2	2	2	2	2	1	1	2	2	3	1	2		76.5	174.267	25.1903	2	38.9	46.8	8		85.5	109.5	0.780822		115	76		247	128	98	106	95			1	3	5	4
66	1	59	5	2	2	2	2	2	2	2	2	2	2	2	2	1	3	3	2	4	1	1		79.7	164.967	29.2864	2	36.7	50.5	9		98	113	0.867257		119	79		105	52	37	82	117			2	1	2	5
67	1	68	4	2	2	1	2	2	2	2	2	2	2	2	2	2	2	2	2	1	0	2		109.5	173.9	36.2089	4	42.7	62.8	14		113	125	0.904		123	75		202	127	46	146	118			1	5	3	1
68	1	67	5	2	2	2	2	2	2	2	2	2	2	2	2	1	1	1	1	1	0	1		75.1	155.967	30.8728	3	37.9	46.6	11		86	112.5	0.764444		131	81		143	54	69	97	94			1	1	1	1
69	1	76	3	1	2	1	2	2	2	2	2	2	2	2	2	2	2	2	2	1	0	1		69.6	159	27.5306	2	38.6	42.8	11		89.5	101	0.886139		126	72		256	137	51	339	105			5	4	5	3
70	1	71	4	2	2	1	1	2	2	2	2	2	2	2	2	2	3	3	2	1	0	1		77.4	159.933	30.2596	3	42.1	44.8	12		99.5	111	0.896396		132	77		188	94	73	108	124			5	3	3	5
71	1	63	5	2	2	2	2	2	2	2	2	2	2	2	2	1	2	2	2	4	1	1		75.1	173.033	25.0831	2	38.9	45.9	9		88.5	110.5	0.800905		108	69		221	132	60	147	91			1	1	3	2
72	1	59	4	2	2	2	2	2	2	2	2	2	2	2	2	1	1	1	1	4	1	1		87	151.867	37.722	4	45.6	47.3	14		110	121	0.909091		155	88		295	202	55	188	122			4	1	5	6
73	1	65	3	1	2	1	2	2	2	1	2	2	2	2	2	2	2	2	2	1	0	1		70.5	153.033	30.1035	3	39.6	42.6	11		95.5	112.5	0.848889		114	64		175	84	71	105	95			1	1	4	3
74	1	43	5	2	2	2	2	2	2	2	2	2	2	1	1	2	1	1	2	4	1	1		101.5	166.833	36.467	4	46.9	53.9	12		110.5	134.5	0.821561		131	80		181	115	46	102	89			1	1	4	4
75	1	53	5	2	2	1	2	2	2	2	2	2	1	2	2	2	1	2	2	4	1	1		88.6	161	34.1808	3	41.1	52.2	11		97.5	122	0.79918		125	80		181	80	42	295	92			1	3	5	5
76	1	57	5	2	2	2	2	2	2	2	2	2	2	2	2	1	2	3	2	4	1	1		65.4	159.067	25.8476	2	34.4	42.9	8		80.5	105	0.766667		112	68		187	96	75	78	89			5	2	4	2
77	1	72	2	1	2	1	2	2	2	2	2	2	2	2	2	2	2	2	1	1	0	1		97.1	165.8	35.3224	4	40.6	57.6	13		92.5	119.5	0.774059		113	60		168	77	56	50	97			4	5	4	5
78	2	65	4	1	2	1	2	2	1	2	2	2	2	2	2	2	1	3	2	4	1	1		107.4	176.033	34.6589	3	27.6	77.8	17		113	88.5	1.27684		123	77		149	80	56	64	104			4	5	2	1
79	1	73	4	2	2	2	2	2	2	2	2	2	2	2	2	1	2	2	2	1	0	1		80.5	162.933	30.3233	3	41.5	47.1	12		98.5	109	0.90367		109	67		169	96	50	112	106			5	2	4	4
80	1	74	3	1	2	1	1	2	2	2	2	2	2	2	2	2	1	2	2	1	0	2		75.9	171	25.9567	2	36.4	48.2	10		115	103	1.1165		97	66		113	34	62	88	111			5	4	4	5
81	1	77	5	2	1	2	2	2	2	2	2	2	2	2	2	2	1	1	2	1	0	1		72.6	154.867	30.2706	3	37.2	45.6	12		95.5	89.5	1.06704		121	76		131	61	56	71	114			1	3	4	4
82	1	65	5	2	2	2	2	2	2	2	2	2	2	2	2	1	1	1	2	1	0	1		82.2	165.067	30.1685	3	46	44.4	12		97	112	0.866071		119	67		240	137	70	166	100			4	4	3	1
83	1	63	5	2	2	2	1	2	2	2	2	2	2	2	2	2	1	2	2	4	1	1		107.2	172.033	36.2218	4	41.3	62.9	13		113.5	114	0.995614		148	89		219	131	56	162	111			1	3	3	1
84	1	67	5	2	1	1	2	2	2	2	2	2	2	2	2	2	1	2	2	4	1	1		88.4	164.067	32.8406	3	41.8	51.4	12		104	116	0.896552		130	71		171	74	53	221	113			3	4	4	4
85	2	69	4	2	2	1	2	2	2	2	2	2	2	2	2	2	2	2	1	1	0	2		135.7	179.933	41.9138	5	39.6	82	27		139.5	90.5	1.54144		129	76		156	74	38	220	124			4	2	4	4
86	1	67	5	2	2	1	2	2	1	2	2	2	2	2	2	2	2	2	2	4	1	1		96.8	159.8	37.9072	4	45.6	52.7	15		107.5	121	0.88843		175	79		206	125	61	100	108			5	5	4	5
87	1	69	5	2	2	1	2	2	2	2	2	2	2	2	2	2	1	1	2	1	0	1		75	160.9	28.97	2	42.7	43	11		99.5	105	0.947619		110	59		191	112	58	105	103			2	3	4	1
88	1	69	5	2	2	1	2	2	2	1	2	2	2	2	2	2	1	1	2	1	0	1		71.6	163.033	26.9377	2	39	43.7	10		90.5	108	0.837963		149	77		185	105	59	103	95			4	3	1	1
89	1	64	4	2	2	1	1	2	2	2	2	2	2	2	2	2	2	2	2	1	0	1		97.6	160	38.125	4	46.3	52.4	15		108	117	0.923077		129	80		246	159	54	167	103			1	3	5	2
90	1	56	4	2	1	2	2	2	1	2	2	2	2	2	2	2	2	2	1	4	1	1		70	157.9	28.0759	2	40.4	41.7	9		94.5	105	0.9		143	84		172	96	48	140	144			3	5	3	4
91	2	69	5	1	2	2	2	2	2	2	2	2	2	2	2	1	2	2	2	1	0	1		135.7	180.1	41.8362	5	38.8	83.1	25		129.5	93.5	1.38503		147	86		172	96	48	140	144			5	5	3	2
92	1	75	5	2	2	2	1	2	2	2	2	2	2	2	2	2	2	2	2	1	0	2		69.9	153.9	29.5121	2	43.3	39.6	12		95	110	0.863636		112	71		239	146	62	157	99			2	3	2	6
93	1	67	4	2	2	1	1	2	2	1	2	2	2	1	2	2	2	2	2	1	0	1		79.5	155.867	32.7236	3	38.7	48.7	11		95.5	102	0.936275		137	81		184	91	41	260	83			1	1	3	1
94	1	64	3	2	1	1	2	2	1	2	2	2	2	2	2	2	3	3	2	4	1	1		121.6	169	42.5755	5	51.1	59.5	18		119.5	130.5	0.915709		122	77		188	90	41	287	109			5	4	4	6
95	2	65	4	2	2	1	2	2	2	2	2	2	2	2	2	2	1	1	2	1	0	2		131.4	184.033	38.7974	4	35.1	85.3	23		136.5	102	1.33824		111	67		221	132	60	157	163			6	4	4	3
96	1	70	4	2	2	1	2	2	2	2	2	2	2	2	2	2	3	3	2	1	0	1		91.9	162.8	34.6742	3	46.7	49	14		109	111	0.981982		112	72		167	80	59	137	121			5	3	3	2
97	1	47	5	2	2	2	2	2	2	2	2	2	2	2	2	1	2	3	2	4	1	2		97.8	163	36.8098	4	47.1	51.8	12		109.5	127	0.862205		124	78		203	110	67	128	117			2	4	3	2
98	1	79	5	2	2	1	1	2	2	2	2	2	2	2	1	2	2	2	2	1	0	1		80.8	162	30.788	3	46.4	43.3	14		105	109	0.963303		125	67		129	24	53	260	99			4	5	3	2
99	1	69	3	1	1	2	2	2	2	1	2	2	2	2	2	2	2	3	2	1	0	1		84.6	157.733	34.0035	3	43.7	47.6	13		97.5	120	0.8125		142	73		185	114	50	103	107			6	4	4	4
100	2	55	5	2	2	2	2	2	1	2	2	2	2	2	2	2	2	3	2	4	1	2		102.9	172.067	34.7554	3	36	65.9	20		121	93	1.30108		150	88		204	117	60	134	99			4	4	3	4
101	2	49	5	2	2	1	2	2	2	2	2	2	2	2	2	2	1	1	1	4	1	2		87.3	155.1	36.2903	4	36.5	55.4	20		101	90	1.12222		123	68		155	86	28	207	138			4	5	5	4
102	1	32	5	1	2	2	1	2	2	2	2	2	2	2	2	2	2	2	2	4	1	1		74.8	163.067	28.1301	2	34.6	48.9	5		88	102	0.862745		106	70		153	76	64	62	89			1	1	4	1
103	2	56	4	1	1	1	2	2	2	2	2	2	2	2	2	2	1	1	2	4	1	2		87.9	166.9	31.5556	3	26.6	64.5	14		121	92.5	1.30811		122	74		193	91	51	258	118			5	4	4	4
104	1	79	2	1	1	1	2	2	2	2	2	2	2	2	2	2	2	2	2	1	0	2		70.9	155.933	29.1587	2	39.6	42.8	12		89.5	105	0.852381		150	75		190	92	80	92	111			6	5	4	6
105	1	51	4	1	2	2	1	2	2	2	2	2	2	2	2	2	3	3	2	3	1	2		73.4	159.833	28.7317	2	34	48.4	7		96.5	99	0.974747		123	83		207	113	60	168	106			5	4	4	4
106	2	61	4	1	2	2	2	2	2	2	2	2	2	2	1	2	3	3	2	4	1	1		94.6	173.133	31.5595	3	27.6	68.5	16		102	98.5	1.03553		137	86		239	148	40	250	97			5	5	5	5
107	2	49	5	1	2	2	2	2	2	2	2	2	2	2	2	1	2	3	1	4	1	2		97.5	179.2	30.3619	3	25.9	72.2	12		120.5	95	1.26842		124	71		215	119	59	187	100			6	4	6	5
108	1	38	5	2	2	1	2	2	2	2	2	2	2	2	2	2	1	1	2	4	1	2		94.5	168.1	33.4423	3	39	57.6	8		102.5	98	1.04592		114	73		146	54	74	91	100			6	3	4	5
109	2	40	5	2	2	2	2	2	2	2	2	2	2	2	2	1	1	3	1	4	1	2		78.8	168.233	27.8421	2	27.8	56.9	11		111.5	95.5	1.16754		124	75		185	90	78	86	107			6	4	5	4
110	2	43	5	2	2	2	2	2	2	2	2	2	2	2	2	1	1	2	2	4	1	1		75	169.267	26.1769	2	25.5	55.9	10		103.5	91.5	1.13115		124	78		158	72	68	94	107			4	4	4	3
111	1	45	5	2	2	2	2	2	2	2	2	2	2	2	2	1	1	1	2	4	1	1		68.8	157.167	27.8527	2	36.4	43.8	7		84	104	0.807692		103	74		220	90	104	129	126			5	3	3	4
112	1	72	4	1	2	1	2	2	2	1	2	2	2	2	2	2	3	3	2	1	0	1		92.8	165.833	33.7446	3	40.6	55.1	13		91	118.25	0.769556		135	74		154	78	46	148	121			6	4	4	4
113	1	68	5	1	2	1	2	2	2	2	2	2	2	2	2	2	1	1	2	4	1	1		78.8	154.767	32.8981	3	43.3	44.7	13		103	108	0.953704		135	76		215	116	63	182	129			5	5	4	3
114	1	69	5	2	2	2	1	2	2	2	2	2	2	2	2	2	1	1	2	1	0	1		76.4	153.067	32.6086	3	42.3	44.1	12		102	110	0.927273		122	70		204	126	55	121	102			1	2	3	4
115	1	68	5	2	2	1	2	2	2	2	2	2	2	2	2	2	2	2	2	1	0	1		75.6	156.1	31.0253	3	41.2	44.5	12		102.5	103	0.995146		123	70		177	83	57	181	101			2	2	3	3
116	1	58	5	1	2	2	2	2	2	2	2	2	2	2	2	1	2	3	2	4	1	1		97	163.367	36.345	4	43.3	55	13		113	115	0.982609		143	90		193	123	49	106	98			1	2	4	4
117	1	71	5	2	2	1	2	2	2	2	2	2	2	2	2	2	1	2	1	1	0	1		81	160.867	31.3006	3	37.2	50.9	11		91	113.5	0.801762		123	79		239	143	53	216	103			5	3	3	4
118	1	36	5	2	2	2	2	2	2	2	2	2	2	2	2	1	1	3	2	4	1	1		78.9	162.233	29.9776	3	33.5	25.5	6		89	116	0.767241		123	77		240	125	96	96	114			5	3	5	4
119	2	46	5	2	1	2	2	2	2	2	2	2	2	2	2	2	1	1	2	4	1	2		84.8	173.133	28.2901	2	28.3	65	10		102	99	1.0303		122	77		274	156	98	97	136			6	4	4	5
120	2	49	5	2	2	1	2	2	2	2	2	2	2	2	2	2	1	1	1	4	1	2		130.7	179.867	40.3993	5	38.7	80.1	26		129.5	98	1.32143		111	70		<100	poniżej normy	32	177	99			6	4	5	4
121	1	76	1	1	1	1	1	2	2	2	2	2	2	2	1	2	3	2	2	1	0	1		92.9	146.767	43.1282	5	45.1	51	17		118.5	131	0.90458		135	64		101	37	43	110	95			5	5	4	5
122	1	64	4	1	2	1	2	2	2	2	2	2	2	2	2	2	2	3	2	1	0	1		116.4	168.233	41.1272	5	45.3	63.6	15		127.5	117.5	1.08511		145	93		204	106	53	223	158			5	4	1	1
123	1	65	5	2	2	2	2	2	2	2	2	2	2	2	2	1	2	2	2	4	1	1		82.4	167.1	29.5103	2	38.9	50.3	10		89	112	0.794643		140	87		228	90	91	233	101			1	1	2	1
124	1	59	4	2	2	1	2	2	2	2	2	2	2	2	2	2	1	3	1	4	1	1		83.3	158	33.368	3	44	46.7	13		99.5	112	0.888393		151	85		184	80	49	277	104			5	4	3	2
125	1	79	4	1	2	1	2	2	2	2	2	2	2	2	2	2	2	3	2	1	0	1		78.6	163.133	29.535	2	45.4	42.9	13		105	110.75	0.948081		110	67		<100	poniżej normy	53	173	118			5	5	4	6
126	1	48	5	2	2	2	2	2	2	2	2	2	2	2	2	1	1	1	2	4	1	1		94.3	160.167	36.7593	4	48.8	48.3	15		119.5	108.5	1.10138		153	75		214	127	69	93	88			4	4	3	5
127	1	80	5	2	1	2	1	2	2	2	2	2	2	2	1	2	1	1	2	4	1	2		84.1	154.167	35.3847	4	47.7	44	16		105.5	116	0.909483		128	76		205	110	74	108	100			5	4	6	3
128	1	68	5	2	2	1	2	2	2	1	2	2	2	1	2	2	2	2	2	1	0	1		91.7	155.833	37.7614	4	44.5	50.9	14		106.5	119	0.894958		131	77		191	121	45	127	99			1	1	1	1
129	1	37	5	2	2	2	1	2	2	2	2	2	1	2	2	2	2	3	2	4	1	1		80.1	171.967	27.0859	2	41.6	46.8	7		87.5	106	0.825472		118	83		267	140	88	136	102			1	1	4	2
130	1	23	2	1	2	2	1	2	2	2	2	2	2	2	2	2	3	2	2	4	1	1		118.6	166.9	42.5767	5	50.4	58.8	12		107	131.5	0.813688		105	68		176	82	46	242	94			2	2	3	2
131	2	50	5	2	1	1	2	2	2	2	2	2	2	2	2	2	2	2	2	4	1	1		97.7	180.167	30.0986	3	24.2	74.1	12		109.5	107	1.02336		116	76		230	140	35	277	146			1	1	3	1
132	1	50	5	1	2	2	1	2	2	2	2	2	2	2	2	2	2	2	2	4	1	1		92.2	163.067	34.6737	3	43.7	52	11		97.5	118	0.826271		116	73		227	128	83	84	115			1	1	3	3
133	2	50	5	2	1	2	2	2	2	2	2	2	2	2	2	2	2	2	1	4	1	1		91.8	170.067	31.7398	3	23.8	70	11		103	100	1.03		104	73		106	24	31	261	103			1	1	2	2
134	1	68	5	2	1	2	2	2	2	2	2	2	2	2	2	2	2	2	2	1	0	1		74.2	162.1	28.2383	2	36	47.5	10		84.5	105	0.804762		116	71		288	203	59	133	104			1	3	4	3
135	1	64	4	2	2	1	2	2	2	2	2	2	2	2	2	2	3	3	1	3	1	2		111.4	168.033	39.4543	4	48.4	57.5	16		127.5	125	1.02		129	78		173	104	42	135	118			5	4	3	5
136	1	63	5	2	2	1	2	2	1	1	2	2	2	2	2	2	1	1	2	4	1	1		85.3	159.933	33.3481	3	38.8	52.2	11		90.5	120	0.754167		172	85		209	101	88	100	110			5	3	3	5
137	1	39	5	2	2	2	2	2	2	2	2	2	2	2	2	1	1	1	2	4	1	1		69.6	161.933	26.5422	2	31.7	47.5	5		84.5	103.5	0.816425		104	68		195	100	70	122	128			5	3	3	4
138	1	61	5	2	2	2	2	2	2	2	2	2	2	2	2	1	1	1	2	4	1	1		85.1	169.767	29.5274	2	43.7	47.9	11		91.5	113.5	0.806167		114	72		195	118	59	89	121			1	1	6	1
139	1	66	5	2	1	1	2	2	2	2	2	2	2	2	2	2	2	2	2	4	1	1		63.6	157.067	25.7804	2	33.3	42.4	8		82	100.5	0.81592		115	71		267	167	70	148	110			1	4	4	1
140	1	47	5	2	2	1	1	2	2	2	2	2	2	2	2	2	1	2	2	4	1	1		80.7	167.867	28.6381	2	35.4	52.2	7		84	111	0.756757		132	86		231	147	65	98	110			1	1	5	2
141	1	63	5	2	2	1	2	2	2	1	2	2	2	2	2	2	2	2	2	4	1	1		73.9	161	28.5097	2	40.2	44.2	10		91.5	102.5	0.892683		118	80		229	130	48	249	111			1	3	1	1
142	1	68	5	2	2	1	1	2	2	2	2	2	2	2	2	2	1	1	2	4	1	1		78.8	156.767	32.0641	3	35.7	50.7	11		95.5	110	0.868182		104	63		142	74	55	60	98			2	4	3	2
143	1	61	4	2	2	2	2	2	2	2	2	2	2	2	2	1	1	1	1	4	1	2		64.2	157.1	26.0125	2	35.4	41.5	8		90	95	0.947368		128	81		359	248	46	328	89			6	4	5	3
144	2	71	5	2	1	1	1	2	2	2	2	2	2	2	2	2	2	2	2	1	0	1		105.8	183.367	31.4662	3	30.9	73.1	19		110	99	1.11111		104	64		102	37	47	89	108			2	3	3	3
145	1	85	4	2	2	2	1	2	1	2	2	2	2	2	2	2	2	2	2	1	0	1		68.8	142	34.1202	3	46.7	36.6	16		107	113.75	0.940659		136	87		171	74	70	135	95			5	5	2	2
146	1	36	4	2	2	2	2	2	2	2	2	2	2	2	2	1	3	1	1	4	1	1		77	171.967	26.0377	2	39.6	46.5	6		88.5	103	0.859223		109	75		229	112	94	115	97			4	3	4	5
147	1	77	4	2	1	1	1	2	2	2	2	2	2	2	2	2	3	3	2	1	0	1		71.4	164.333	26.4391	2	41.9	41.5	11		91.5	105.5	0.867299		140	76		178	82	64	158	94			6	4	3	5
148	1	74	5	2	1	1	2	2	1	1	2	2	2	2	2	2	1	2	2	1	0	1		77.9	164.133	28.9164	2	38	48.3	11		100.5	105.5	0.952607		137	73		189	116	53	95	101			5	4	3	4
149	1	67	5	2	2	2	2	2	1	2	2	2	2	2	2	2	2	2	2	1	0	1		73.4	157.233	29.6898	2	40.2	43.9	11		93.5	103	0.907767		116	77		218	109	51	291	113			4	4	5	5
150	1	74	4	2	2	2	2	2	2	2	2	2	2	2	2	1	1	2	2	1	0	2		62.5	155.1	25.981	2	38.2	38.6	10		80	100.5	0.79602		135	82		183	103	55	124	104			6	5	5	2
151	1	58	5	2	2	2	2	2	2	2	2	2	2	2	2	1	1	1	1	3	1	2		70.4	163.333	26.389	2	40.8	41.7	9		85	104	0.817308		114	77		273	146	86	207	83			6	4	4	5
152	1	64	4	2	2	2	1	2	2	2	2	2	2	2	2	2	1	2	2	4	1	1		77.6	165.067	28.4802	2	41.6	45.3	10		92.5	107.5	0.860465		114	64		272	174	59	196	103			6	6	5	3
153	1	63	5	2	2	2	2	2	2	1	2	2	2	2	2	2	3	3	2	4	1	1		68.8	159.167	27.1572	2	33.9	45.5	8		85.5	97	0.881443		139	81		194	107	43	226	104			3	3	2	1
154	1	61	4	2	2	2	1	2	2	2	2	2	2	2	2	2	1	2	1	3	1	1		80.7	157.233	32.6426	3	43.5	45.6	12		101.5	120	0.845833		109	69		191	104	52	172	97			6	4	4	4
155	1	57	4	1	2	2	1	2	2	2	2	2	2	2	2	2	1	3	2	4	1	1		78.3	166.333	28.3011	2	38.2	48.4	9		87.5	112	0.78125		127	80		195	102	58	171	97			6	1	2	3
156	1	57	5	1	1	2	2	2	2	2	2	2	2	2	2	2	2	2	2	4	1	1		90.3	172.133	30.476	3	41.2	53.1	10		101	114.5	0.882096		107	69		188	114	49	127	119			1	1	3	1
157	2	50	5	2	1	2	2	2	2	2	2	2	2	2	2	2	1	3	1	4	1	2		94.2	179.267	29.3124	2	22.8	72.7	11		109	102	1.06863		172	86		192	130	40	110	104			4	3	5	3
158	1	50	5	1	2	2	1	2	2	2	2	2	2	2	2	2	2	2	2	4	1	1		90.3	163.1	33.9453	3	43.2	51.3	11		95.5	106	0.900943		112	74		161	70	78	63	103			1	1	3	3
159	1	68	4	2	1	1	2	2	2	2	2	2	2	2	2	2	3	3	2	1	0	1		67.3	159.333	26.5095	2	39	41.1	10		86	97	0.89		121	80		221	138	49	171	90			1	3	2	3
160	1	57	5	1	2	2	2	2	2	2	2	2	2	2	2	1	2	2	2	3	1	1		71.1	157.3	28.7351	2	39.6	42.9	9		84	98	0.86		109	67		250	166	60	118	90			1	1	5	1
161	1	64	5	2	2	2	2	2	2	2	2	2	2	2	2	1	2	3	2	4	1	2		67.8	160.033	26.4733	2	38	42.1	9		86	98	0.88		106	73		208	136	45	135	91			4	2	2	4
162	1	70	4	1	2	1	1	2	2	2	2	2	2	2	2	2	2	2	2	1	0	1		86.7	161.833	33.1042	3	43.1	49.4	13		105	126	0.833333		122	73		212	110	70	160	106			1	5	4	4
163	1	70	5	2	2	1	2	2	2	2	2	2	2	2	2	2	2	2	1	1	0	1		72.2	161.167	27.7963	2	36.9	45.5	10		95	103	0.92233		128	73		329	228	53	237	96			1	1	3	1
164	1	67	5	2	2	2	1	2	1	1	2	2	2	2	2	2	2	2	2	1	0	1		63.9	158.333	25.4892	2	40.7	37.9	10		92	102.5	0.897561		110	73		193	113	51	144	98			1	4	4	1
165	2	68	3	2	2	1	2	2	2	2	2	2	2	2	2	2	1	1	2	1	0	1		89.2	165.833	32.4355	3	32.1	60.6	19		117	104	1.125		136	78		174	84	57	162	118			1	1	4	2
166	2	70	5	2	2	1	2	2	1	2	2	2	2	2	2	2	2	2	2	1	0	1		84.9	176.267	27.3254	2	20.2	67.8	13		101	103	0.980583		124	77		197	112	71	72	110			5	4	2	1
167	1	59	5	2	2	1	2	2	2	1	2	2	2	2	2	2	2	2	2	1	0	1		64.7	148.2	29.4583	2	32	16.4	9		93	115	0.808696		116	58		220	123	66	153	94			1	1	2	2
168	2	64	3	2	2	1	2	2	2	2	2	2	2	2	2	2	2	3	1	1	0	2		136	177.267	43.2798	5	43.4	77	30		137.25	120	1.14375		136	93		124	40	41	214	102			5	1	3	4
169	1	63	4	2	2	2	1	2	2	2	2	2	2	2	2	2	1	2	1	3	1	1		66.9	159.367	26.3409	2	33.5	44.5	8		90.5	115.25	0.785249		103	68		170	96	57	87	81			6	3	4	4
170	1	74	3	2	2	1	2	2	2	1	2	2	2	2	2	2	1	2	2	1	0	1		61.6	155.233	25.5629	2	40.5	36.7	11		81	100	0.81		136	86		256	132	48	385	134			5	4	3	4
171	2	54	5	2	2	2	2	2	1	2	2	2	2	2	2	2	1	1	2	4	1	2		90.1	180.267	27.7264	2	24.3	68.2	12		101.5	107	0.948598		130	84		249	167	47	174	99			5	4	3	5
172	1	77	5	2	1	1	1	2	2	2	2	2	2	2	2	2	2	2	2	4	1	1		92.9	167.367	33.1648	3	45.3	50.8	14		107.5	121.5	0.884774		96	62		<100	poniżej normy	69	89	114			5	3	3	5
[truncated: 65 more columns]

## Sheet: Zung Self-Rating (SDS)
Number/Questions	ZUNG1	ZUNG2	ZUNG3	ZUNG4	ZUNG5	ZUNG6	ZUNG7	ZUNG8	ZUNG9	ZUNG10	ZUNG11	ZUNG12	ZUNG13	ZUNG14	ZUNG15	ZUNG16	ZUNG17	ZUNG18	ZUNG19	ZUNG20
001	3	2	1	3	1	2	1	2	1	4	2	3	4	3	3	2	3	3	2	3
002	1	3	1	1	1	1	1	1	2	2	3	3	1	4	1	4	4	4	1	4
003	2	3	1	1	2	2	1	3	1	2	3	3	1	4	1	3	4	4	1	4
004	2	3	1	1	2	2	1	3	1	2	3	3	1	4	1	3	3	4	1	4
005	2	1	1	2	2	1	1	1	2	3	2	1	1	2	1	2	1	2	1	1
006	2	1	2	2	2	2	2	1	2	2	3	3	2	2	3	3	3	3	3	3
007	2	3	1	2	3	2	2	2	2	2	2	2	2	3	3	3	2	2	3	3
008	1	1	1	2	2	2	1	1	1	2	4	3	1	4	1	4	4	4	1	4
009	2	3	3	2	1	2	2	2	2	2	3	2	3	2	2	3	2	2	4	3
010	4	2	3	1	3	4	1	3	4	3	1	2	3	3	3	2	3	3	1	2
011	3	2	2	3	3	1	1	3	2	1	3	2	2	2	3	2	3	2	2	2
012	2	2	1	2	1	3	1	1	1	4	3	3	1	2	2	3	3	3	1	3
013	3	1	1	2	1	2	1	1	1	2	2	1	1	1	3	4	3	4	1	4
014	1	1	2	3	3	3	2	1	1	1	4	3	1	3	1	3	3	4	1	4
015	3	1	2	1	1	1	2	4	1	1	3	2	1	2	2	3	4	4	1	4
016	3	4	1	1	4	1	1	1	1	2	2	2	1	1	1	4	4	3	1	4
017	3	2	3	2	2	1	3	1	1	3	2	2	2	2	3	3	2	3	1	3
018	2	2	1	2	2	1	2	1	2	2	2	2	4	2	2	2	2	2	1	2
019	2	2	2	1	1	3	1	1	3	3	2	2	1	2	2	3	4	3	1	4
020	2	2	1	3	3	2	1	2	2	2	4	3	2	3	1	2	2	3	1	3
021	1	4	1	2	3	1	1	1	3	2	4	2	4	4	3	3	3	3	1	4
022	2	4	1	2	2	3	1	3	2	2	3	3	3	3	2	3	3	3	2	3
023	2	1	1	4	2	1	1	2	3	3	3	1	1	3	3	2	2	2	2	1
024	2	1	4	4	1	4	1	1	3	2	2	2	3	1	1	3	2	1	1	2
025	2	3	2	1	1	2	1	1	1	1	3	3	2	4	1	4	2	4	1	3
026	1	3	1	2	4	2	1	1	1	2	4	3	1	4	1	2	4	4	1	4
027	2	2	1	2	4	2	1	1	1	3	3	3	2	2	4	2	4	2	1	3
028	2	1	2	1	1	2	2	2	1	1	3	3	1	3	2	3	3	2	1	3
029	1	1	3	3	3	1	1	1	2	1	4	3	1	4	2	3	3	4	1	3
030	4	1	4	3	3	1	2	1	3	4	3	2	4	3	4	1	4	1	1	1
031	2	1	2	4	1	1	1	4	3	4	3	2	2	2	2	2	2	2	2	2
032	2	3	1	2	3	3	2	2	2	1	3	3	2	3	1	3	3	3	1	3
033	2	2	2	2	2	1	1	4	3	3	3	2	2	2	4	1	2	2	2	2
034	2	3	1	4	2	4	1	2	2	2	3	3	2	3	2	3	4	3	1	3
035	2	4	3	2	3	4	3	2	2	1	3	2	3	4	1	4	4	1	1	4
036	3	1	1	2	3	3	1	3	1	4	4	4	2	4	4	4	4	4	4	3
037	3	4	3	4	2	2	3	2	2	2	3	2	3	3	4	4	2	3	3	2
038	1	4	1	1	4	2	1	2	1	2	4	4	2	4	1	4	4	4	1	4
039	1	4	1	1	4	1	1	3	1	2	4	4	2	4	1	4	4	4	1	4
040	2	3	2	1	4	4	2	1	3	1	4	4	2	3	2	3	3	3	1	4
041	3	1	3	1	1	2	1	3	4	4	1	1	4	2	4	1	2	2	1	1
042	2	2	2	2	3	4	1	2	2	4	3	2	3	3	2	3	3	3	1	3
043	2	1	1	2	3	2	1	1	1	3	3	3	3	3	2	2	3	3	1	3
044	1	3	1	1	4	1	1	1	4	3	4	2	1	4	1	3	4	4	1	1
045	2	4	2	2	3	2	1	2	2	2	4	3	3	4	3	3	3	3	1	2
046	1	4	1	1	2	1	1	4	4	4	1	2	3	2	3	2	2	3	1	2
047	3	1	3	1	1	2	1	3	4	4	1	1	4	2	4	1	2	2	1	1
048	1	1	3	4	2	1	2	1	1	2	2	2	1	2	2	2	1	2	1	2
049	2	3	1	2	2	2	1	2	2	2	2	2	1	2	3	2	2	2	1	2
050	2	1	1	4	2	2	1	2	3	3	3	3	3	2	4	2	3	3	1	3
051	1	1	1	1	2	2	1	2	1	3	4	4	1	3	2	3	3	4	1	4
052	2	3	2	2	2	1	2	3	4	2	3	3	3	3	2	3	3	1	3	3
053	2	2	1	3	1	3	1	1	2	3	2	2	2	4	2	2	4	4	1	3
054	2	3	1	3	2	3	2	1	3	2	3	3	2	3	2	2	3	3	1	3
055	4	2	2	4	3	1	1	2	2	3	2	1	2	2	3	3	1	3	2	3
056	3	3	1	4	4	2	2	4	4	4	3	3	4	3	1	3	2	2	2	3
057	4	1	3	4	3	1	1	1	4	2	1	2	2	2	4	1	2	3	2	2
058	1	4	1	1	2	1	1	1	1	1	4	4	1	2	1	2	1	1	2	4
059	3	1	1	2	4	1	4	2	2	2	2	2	1	2	2	2	2	2	1	2
060	1	3	1	1	3	3	1	1	1	1	3	3	1	1	1	3	4	4	1	3
061	1	2	1	3	4	1	3	1	2	2	3	2	2	4	1	3	4	4	1	4
062	1	2	1	1	2	3	2	2	2	1	4	4	2	4	4	4	4	4	1	4
063	4	1	4	3	1	1	1	3	2	3	1	1	4	1	4	1	1	1	2	3
064	2	1	1	3	1	1	3	3	1	4	1	2	3	2	3	1	2	4	1	2
065	1	1	1	2	3	3	1	1	1	1	4	3	1	4	1	3	4	4	1	4
066	1	2	1	2	3	1	2	4	1	2	2	2	1	2	2	3	3	3	1	2
067	1	2	1	1	1	3	1	2	1	1	2	1	1	4	1	4	3	4	1	4
068	3	3	3	2	3	4	2	4	2	1	3	3	1	2	2	3	4	3	1	3
069	1	2	2	4	4	1	1	1	1	1	4	3	4	4	3	4	4	3	4	1
070	1	4	2	2	3	1	1	3	2	2	4	4	1	4	1	3	2	3	1	3
071	2	4	2	1	4	1	1	2	1	1	3	3	2	2	2	2	2	2	1	4
072	2	2	2	2	3	1	1	3	3	3	3	2	1	3	2	4	4	4	1	3
073	2	2	1	3	1	1	2	2	1	1	3	4	3	4	1	4	4	4	1	4
074	2	2	2	3	3	1	1	2	2	3	2	3	2	2	3	3	3	3	2	3
075	3	2	2	1	3	2	1	2	2	1	2	1	2	1	3	1	2	2	2	2
076	2	2	2	4	3	3	1	2	2	2	2	2	2	3	2	2	3	2	1	2
077	1	4	1	1	4	1	1	1	1	1	4	4	3	2	3	3	4	4	1	4
078	2	3	1	2	1	2	2	1	2	1	3	3	1	4	3	4	4	4	1	4
079	1	4	1	2	2	3	2	1	1	1	4	4	4	4	3	3	4	4	1	4
080	1	4	1	1	4	1	1	1	1	1	4	4	1	4	1	4	4	4	1	4
081	1	1	1	2	2	1	2	4	3	4	3	3	3	3	2	4	3	3	2	4
082	3	2	1	3	2	1	1	1	1	3	4	2	1	2	3	3	4	2	1	3
083	3	3	1	1	2	1	1	1	2	2	3	3	3	1	3	3	1	1	3	2
084	1	2	1	1	2	1	1	1	3	2	3	2	2	2	2	3	3	3	1	2
085	1	3	1	3	1	2	2	2	2	3	2	2	2	3	3	3	3	2	1	4
086	1	1	1	2	3	2	1	2	2	2	3	3	1	4	1	4	4	3	1	4
087	2	2	2	3	3	1	1	2	2	3	3	3	2	1	2	2	2	3	1	3
088	2	3	2	2	3	3	2	3	2	2	3	3	3	2	2	2	3	3	1	3
089	1	3	2	3	3	1	1	1	1	2	2	3	2	3	2	3	3	3	1	4
090	2	3	2	3	3	2	2	3	4	4	3	2	1	4	2	3	4	4	1	4
091	1	1	1	1	3	2	2	1	1	1	3	3	1	4	2	4	4	4	1	4
092	1	1	1	3	4	1	1	1	4	1	1	2	1	4	1	3	4	4	1	3
093	1	4	1	2	4	1	1	1	1	1	2	2	1	2	2	2	4	4	1	4
094	2	1	1	3	2	1	1	1	3	3	2	2	1	2	2	2	3	3	2	3
095	1	4	1	1	4	1	1	1	4	1	4	4	1	4	1	4	4	4	1	4
096	2	2	1	4	2	1	2	1	1	2	4	3	3	3	1	3	3	3	1	4
097	1	3	1	1	3	4	1	1	1	1	3	3	1	3	1	3	4	4	1	4
098	1	1	1	2	2	1	2	1	2	1	4	2	1	1	2	4	4	4	3	4
099	1	4	1	1	4	1	1	1	1	1	4	4	1	4	1	4	4	4	1	4
100	1	4	1	2	2	2	1	2	1	1	2	4	1	4	1	4	4	4	1	4
101	2	2	1	1	3	2	1	1	3	1	4	4	1	4	1	4	3	3	1	3
102	3	2	3	2	2	2	4	4	4	4	2	2	3	2	2	2	4	3	1	2
103	1	3	1	1	4	4	1	1	1	1	3	3	1	4	1	4	4	4	1	4
104	1	4	1	1	4	1	1	1	1	1	4	4	1	4	1	4	4	4	1	4
105	1	4	1	1	4	1	1	1	1	1	4	4	1	4	1	4	4	4	1	4
106	1	4	1	1	4	1	1	1	1	1	4	4	1	4	1	4	4	4	1	4
107	1	3	1	4	4	4	1	1	1	1	4	4	1	4	2	3	3	3	1	3
108	2	2	2	3	3	1	2	1	3	3	2	3	1	3	2	3	2	3	1	2
109	1	4	1	2	4	2	1	3	2	4	4	4	1	3	2	4	4	4	1	4
110	1	4	1	1	4	4	1	1	1	1	4	4	1	4	1	4	4	4	1	4
111	1	4	1	2	3	2	1	2	3	1	3	3	1	4	1	4	3	4	1	4
112	2	3	1	1	4	3	1	1	1	1	3	3	2	3	1	4	3	3	1	4
113	1	4	1	4	3	1	1	1	2	1	3	2	2	2	2	4	4	3	1	4
114	2	2	1	4	3	1	1	2	1	1	4	2	2	1	3	1	4	2	1	2
115	1	4	1	1	2	2	2	1	1	2	4	3	1	3	2	4	3	4	1	3
116	3	1	3	3	3	3	1	3	4	4	1	1	1	3	2	2	3	3	1	4
117	1	4	1	1	3	1	1	1	2	1	4	4	2	3	2	4	4	4	1	4
118	2	3	1	1	4	4	1	1	3	3	4	4	1	4	1	4	3	4	1	4
119	2	2	1	2	2	1	1	1	3	3	4	4	3	4	1	4	3	3	1	3
120	2	3	1	1	4	1	1	1	1	3	4	4	2	3	2	4	4	3	1	4
121	3	4	1	1	1	2	4	1	1	1	1	4	1	4	4	4	1	1	1	4
122	1	1	1	1	4	1	1	1	1	1	4	4	1	4	1	4	4	4	1	4
123	1	4	1	1	3	3	2	1	1	1	4	4	1	4	1	4	4	4	1	1
124	1	4	1	1	4	1	1	1	1	1	4	3	2	4	1	3	4	4	1	4
125	1	4	1	1	4	1	1	1	1	1	4	4	1	4	1	4	4	4	1	4
126	2	3	2	2	2	1	1	1	1	4	3	2	2	3	2	3	2	3	1	4
127	2	4	1	1	4	2	1	1	2	1	4	4	1	3	2	3	3	4	1	4
128	1	1	1	1	3	1	1	3	1	2	4	3	1	3	2	3	2	3	1	3
129	4	3	2	2	1	4	1	1	1	3	3	2	2	2	3	2	1	1	2	2
130	2	3	1	2	2	1	1	2	1	3	2	3	1	2	1	2	4	3	1	3
131	2	2	1	2	4	4	2	1	1	1	3	3	2	3	2	3	2	2	1	4
132	2	4	1	1	1	4	1	1	1	2	3	3	3	4	2	4	4	4	1	4
133	2	2	1	2	3	4	2	1	1	2	4	4	2	3	3	4	3	3	1	3
134	2	1	1	2	4	2	1	2	1	1	4	3	1	3	2	3	3	4	1	4
135	2	3	1	3	4	1	1	1	1	3	2	3	3	3	1	4	4	4	1	4
136	1	3	1	2	1	1	1	3	3	3	2	3	3	1	3	1	3	3	1	3
137	2	2	1	1	1	1	1	1	1	1	4	4	2	3	1	3	3	3	1	4
138	1	1	1	4	3	2	1	3	3	3	4	4	2	4	1	4	4	4	1	4
139	2	4	2	1	3	2	1	1	1	2	2	2	2	3	2	3	3	3	1	3
140	3	3	3	2	3	2	1	1	2	4	1	2	2	2	4	3	3	2	2	2
141	1	1	2	4	4	1	2	2	1	2	4	4	2	3	3	4	4	3	1	4
142	1	3	1	3	3	2	1	1	2	3	3	3	3	1	3	2	1	1	4	1
143	4	2	2	3	3	1	1	3	3	3	1	1	2	2	4	3	3	2	1	3
144	2	3	1	3	2	2	2	3	2	3	2	2	3	2	2	3	2	2	2	3
145	1	3	1	3	3	1	1	1	2	4	4	2	2	1	4	3	3	3	1	2
146	2	3	2	3	1	1	1	1	3	2	4	3	2	4	1	3	3	3	1	4
147	1	4	1	1	4	1	1	1	1	1	4	4	1	4	1	4	4	4	1	4
148	1	2	3	1	2	1	1	3	1	2	4	4	1	4	1	4	4	4	1	4
149	2	3	1	2	4	1	1	2	1	3	4	4	1	4	2	4	3	4	1	4
150	2	1	2	3	2	1	1	2	2	3	2	2	2	4	2	3	3	4	1	1
151	4	1	4	2	1	1	1	4	3	3	2	2	3	2	4	2	3	3	1	3
152	1	3	1	1	2	3	1	1	1	2	2	2	1	3	2	3	3	3	1	2
153	2	4	1	2	2	2	1	1	1	1	4	3	1	2	2	3	3	2	1	3
154	2	2	1	2	3	3	2	1	2	1	4	3	2	4	2	2	4	4	1	4
155	2	1	2	1	1	1	1	1	1	1	4	4	1	1	3	4	4	1	1	4
156	3	3	1	2	2	3	1	4	2	1	2	4	1	2	2	4	2	2	1	4
157	1	4	1	1	2	2	1	1	2	2	4	4	2	3	1	4	4	4	1	4
158	2	4	1	1	1	4	1	1	1	2	3	3	3	4	2	4	4	4	1	4
159	1	3	1	2	2	1	1	1	2	3	2	1	1	2	1	2	4	2	2	2
160	1	4	1	1	4	2	1	2	1	1	3	3	2	3	2	2	3	3	1	4
161	1	4	2	1	4	1	1	4	1	1	4	4	1	4	1	3	3	3	1	3
162	1	1	1	2	3	3	1	3	2	3	3	3	3	4	2	2	3	3	1	4
163	1	1	1	2	2	1	1	2	2	2	3	3	1	3	1	3	3	3	1	1
164	2	2	2	2	3	2	2	3	2	2	2	2	2	2	2	3	3	3	1	3
165	1	1	1	3	2	3	2	1	1	1	3	2	2	3	3	3	3	3	1	2
166	4	2	3	4	3	3	1	4	1	1	2	1	2	2	2	2	2	2	1	3
167	2	3	1	2	1	1	1	3	3	1	2	2	3	2	2	3	2	3	1	3
168	2	1	1	1	4	3	2	2	2	3	2	3	4	2	3	3	4	1	2	3
169	2	4	1	2	2	1	1	2	3	3	4	4	1	4	1	3	4	3	1	3
170	1	1	3	3	1	1	1	3	4	4	1	2	3	2	3	1	1	2	1	2
171	1	3	1	4	1	2	1	3	3	3	1	2	3	3	3	2	3	3	2	2
172	1	2	1	2	2	1	2	3	2	2	3	2	1	3	1	3	3	3	1	3

## Sheet: TFEQ-18
Number/Questions	TFEQ-18.1	TFEQ-18. 2	TFEQ-18. 3	TFEQ-18. 4	TFEQ-18. 5	TFEQ-18. 6	TFEQ-18. 7	TFEQ-18. 8	TFEQ-18. 9	TFEQ-18. 10	TFEQ-18. 11	TFEQ-18. 12	TFEQ-18. 13	TFEQ-18. 14	TFEQ-18. 15	TFEQ-18. 16	TFEQ-18. 17	TFEQ-18. 18
001	3	1	3	2	3	1	3	2	3	3	2	3	2	3	2	2	3	5
002	4	2	1	4	1	3	3	3	3	3	1	2	3	1	2	2	2	4
003	3	4	4	4	1	3	3	4	2	2	3	4	4	3	2	4	2	4
004	3	4	4	4	1	3	3	4	2	2	2	4	3	3	2	4	2	4
005	2	3	3	2	2	2	3	3	2	2	3	3	2	2	2	2	3	3
006	1	2	2	2	1	1	1	2	2	3	3	2	2	2	2	3	3	6
007	3	2	3	3	1	2	1	2	3	3	2	3	1	2	3	3	3	5
008	3	2	3	2	2	3	3	4	3	3	2	3	3	2	3	3	3	4
009	2	2	3	3	3	3	3	2	2	2	3	3	3	2	2	2	2	4
010	3	3	2	3	3	2	2	2	3	3	2	3	2	3	3	2	2	5
011	3	1	2	2	2	3	3	2	4	3	3	4	3	3	3	3	3	5
012	3	2	3	2	2	3	3	2	3	3	2	2	3	2	2	2	3	4
013	2	2	3	2	3	3	3	2	3	3	3	2	3	2	2	3	3	6
014	3	2	2	2	2	3	3	2	2	1	3	3	3	1	2	3	2	2
015	2	2	3	2	2	3	3	2	2	2	3	2	3	2	3	3	4	7
016	3	3	2	3	3	3	3	3	3	3	3	3	3	1	3	1	1	5
017	2	1	2	2	2	3	3	2	3	2	3	3	2	2	3	2	3	5
018	4	2	4	2	2	4	3	2	3	3	4	3	3	2	2	3	1	5
019	4	3	2	2	2	2	2	1	3	3	2	1	1	2	2	1	3	5
020	3	3	2	2	2	2	4	2	3	2	3	3	3	2	3	2	3	3
021	3	1	1	1	1	1	1	1	3	4	1	1	1	3	2	2	3	2
022	3	2	1	2	2	3	3	2	3	3	2	1	2	2	1	1	3	2
023	4	1	3	1	3	2	2	1	3	4	4	3	3	2	2	1	4	2
024	4	3	3	3	1	2	2	3	3	3	2	1	2	2	2	1	1	4
025	2	2	3	3	3	3	3	2	2	3	3	2	2	3	2	2	2	4
026	2	3	2	3	2	3	3	3	2	2	4	4	4	2	3	3	1	4
027	4	4	4	3	2	3	3	2	4	4	2	2	2	2	1	3	1	2
028	2	2	3	3	3	3	4	3	2	3	4	3	3	1	2	2	1	3
029	2	3	4	3	2	4	4	3	4	3	4	3	4	2	2	3	1	2
030	4	1	3	2	3	1	3	2	3	1	3	2	2	3	2	4	3	3
031	3	1	2	1	2	3	2	2	3	2	2	3	3	3	3	2	2	4
032	3	2	3	2	2	2	3	2	2	3	3	2	2	2	2	2	3	5
033	3	2	3	1	3	2	2	1	3	4	3	3	3	2	1	1	3	3
034	4	1	3	1	3	4	4	3	4	4	4	4	3	2	3	2	2	4
035	1	2	2	2	2	4	4	3	2	2	3	2	4	2	3	2	3	5
036	3	1	3	2	3	3	2	2	3	2	3	4	3	3	2	3	3	3
037	2	4	2	3	2	3	3	2	3	4	2	2	3	2	2	2	3	2
038	3	3	2	3	3	2	2	4	3	2	1	3	3	3	4	4	1	5
039	3	3	2	3	1	3	3	3	3	3	2	3	3	2	3	3	2	4
040	2	2	3	3	2	3	4	3	3	2	3	4	4	2	3	3	3	5
041	4	3	3	4	3	4	4	4	2	2	2	4	4	2	3	3	1	5
042	3	2	3	2	2	4	4	3	3	2	3	3	3	2	3	3	2	5
043	3	2	2	2	1	1	2	2	3	3	1	2	1	3	2	2	3	3
044	3	4	4	3	3	3	4	4	2	2	4	4	3	1	4	3	1	5
045	3	2	3	3	2	2	2	3	4	4	3	4	3	3	4	2	3	1
046	4	2	1	2	1	1	2	2	4	3	2	1	2	4	1	1	3	1
047	2	3	3	2	2	2	3	2	3	2	2	2	3	2	3	3	3	6
048	3	4	4	3	3	3	3	3	3	3	3	3	3	2	3	2	3	4
049	3	2	4	3	3	3	3	2	2	3	4	4	4	2	3	3	2	4
050	2	2	3	3	2	3	3	3	3	3	1	4	3	2	2	2	2	4
051	3	1	2	1	1	3	3	1	3	3	3	3	3	2	2	2	2	4
052	2	2	3	2	2	3	3	2	3	2	3	4	1	2	3	2	2	4
053	3	1	2	2	2	3	3	2	2	2	3	4	3	1	3	3	2	6
054	3	1	3	1	3	2	3	1	3	4	3	3	2	2	3	1	2	5
055	3	3	2	3	3	2	2	3	3	2	2	2	3	2	2	3	3	6
056	3	2	3	2	3	3	3	2	2	2	3	3	3	2	3	3	2	4
057	3	1	2	1	2	2	1	2	3	4	2	2	1	4	2	1	3	1
058	4	2	3	2	3	2	3	2	4	2	3	4	3	2	3	2	3	4
059	4	4	4	3	3	4	4	3	4	3	3	4	4	1	2	3	1	2
060	3	4	4	4	4	4	4	4	4	4	4	4	4	1	3	2	1	4
061	3	2	3	3	2	3	4	2	3	2	3	3	4	2	3	3	1	5
062	3	1	4	3	3	3	2	3	3	2	2	4	4	3	2	2	3	3
063	4	4	4	4	3	3	4	3	4	2	1	3	3	2	2	4	1	1
064	3	2	3	3	3	3	4	4	4	4	2	4	4	2	3	3	2	3
065	2	3	2	3	2	3	4	3	2	2	3	4	3	3	3	3	1	4
066	1	1	1	1	2	2	2	2	1	1	2	2	2	4	3	3	3	6
067	4	1	3	2	2	2	3	3	3	3	2	2	2	3	2	3	3	3
068	2	3	4	2	3	3	3	3	2	1	3	3	3	2	3	3	2	5
069	2	4	4	4	4	4	4	4	2	2	4	3	4	1	3	2	1	4
070	3	2	3	2	2	3	3	2	3	4	3	3	2	4	1	1	3	4
071	4	3	1	2	2	3	2	3	4	2	2	2	3	2	2	3	3	3
072	4	2	2	1	3	3	3	2	3	3	2	3	3	3	2	1	3	3
073	2	3	2	3	2	2	3	3	3	2	3	2	3	3	2	2	3	5
074	2	2	2	2	1	2	3	2	2	2	3	2	2	2	2	1	3	5
075	4	1	1	1	1	3	3	1	4	4	3	3	2	3	2	2	3	3
076	2	2	2	1	2	3	3	1	3	3	2	3	2	2	3	2	3	4
077	2	2	3	1	3	2	3	1	3	3	3	3	2	2	2	2	3	3
078	2	3	2	4	3	3	4	4	2	1	3	4	4	2	1	3	1	6
079	3	4	4	4	3	3	3	4	2	2	3	4	4	2	3	3	1	4
080	3	1	2	1	3	3	3	1	3	4	3	3	3	2	1	1	2	2
081	3	3	3	3	2	3	3	3	3	3	3	3	3	1	2	3	1	4
082	3	2	3	2	2	4	3	3	3	2	3	3	3	1	2	2	1	5
083	2	3	3	3	4	4	4	3	2	1	4	4	4	1	4	4	4	7
084	3	3	2	2	2	2	2	4	4	2	2	2	2	3	3	2	2	3
085	4	3	1	3	1	3	3	3	4	4	1	1	2	3	2	1	3	2
086	3	2	3	2	3	3	3	4	3	3	3	4	3	1	3	3	2	5
087	3	1	2	1	2	2	2	2	3	2	2	1	2	3	3	3	3	3
088	2	2	3	2	2	3	3	2	2	2	3	2	3	2	3	3	1	5
089	3	2	2	1	3	3	3	2	3	3	3	2	3	3	2	3	3	4
090	2	3	4	4	4	3	4	4	2	2	4	4	4	2	3	3	2	4
091	2	3	4	4	3	4	4	4	2	4	4	4	4	2	3	3	1	3
092	3	4	3	4	4	3	4	4	2	2	4	4	4	2	2	3	3	5
093	2	3	3	3	2	3	4	3	2	1	4	3	2	3	2	3	2	7
094	2	2	2	2	2	3	3	2	4	4	3	3	3	2	3	1	2	4
095	4	4	1	4	1	2	2	4	4	4	2	1	2	2	2	2	1	1
096	2	3	3	4	2	3	3	4	3	2	3	4	3	2	3	2	1	6
097	3	4	4	4	4	4	4	4	3	3	3	4	4	2	3	2	1	3
098	3	3	3	3	3	3	4	4	3	3	3	4	4	2	3	3	2	6
099	3	2	3	1	3	3	3	1	3	4	2	3	3	2	2	2	1	3
100	3	2	2	3	2	2	3	3	4	4	3	2	2	2	3	3	2	2
101	3	3	2	2	1	1	2	3	4	4	3	2	2	3	1	1	3	1
102	3	2	3	2	2	3	3	2	3	2	2	3	2	2	2	2	3	3
103	4	3	1	3	1	2	2	3	4	4	2	1	2	4	1	1	3	2
104	4	2	3	2	3	3	3	2	4	4	4	3	3	2	2	2	2	1
105	2	3	3	3	3	3	3	3	1	1	2	3	2	3	2	1	3	7
106	4	3	1	2	1	2	2	3	4	4	2	2	2	4	1	1	2	2
107	3	2	2	3	1	3	2	3	3	4	3	2	2	2	2	2	1	2
108	4	1	3	1	2	2	3	1	4	4	2	3	2	3	2	1	3	2
109	3	2	3	2	3	3	3	2	4	4	3	3	3	2	2	3	1	3
110	3	2	3	2	4	4	3	2	3	3	3	3	3	1	3	3	1	2
111	4	1	3	2	3	4	4	2	3	3	3	3	3	2	3	3	1	4
112	4	2	3	2	3	3	3	1	3	4	4	3	3	2	2	2	2	2
113	4	1	3	2	3	3	3	2	3	3	2	3	3	3	2	2	2	3
114	3	4	4	3	3	4	4	4	2	2	3	3	3	2	3	3	1	5
115	3	3	3	3	2	3	3	2	3	2	3	3	3	2	2	3	3	4
116	4	2	2	2	2	3	4	2	3	3	3	3	2	2	3	2	3	3
117	3	1	3	2	4	4	4	2	3	4	3	3	3	2	2	3	1	2
118	3	2	3	1	3	2	3	1	4	3	3	4	3	2	1	3	2	3
119	4	3	1	2	2	2	2	3	4	4	2	2	2	3	1	1	2	1
120	4	2	2	3	1	1	2	3	4	4	2	2	2	2	1	1	2	1
121	1	1	3	1	1	3	3	1	1	1	1	4	4	3	4	4	2	8
122	3	3	3	3	2	2	3	3	3	2	2	2	2	2	2	3	2	5
123	3	3	4	4	4	4	4	4	2	2	4	4	4	1	4	4	1	6
124	3	1	4	1	4	3	3	1	3	3	3	4	3	2	2	2	2	4
125	3	2	3	2	3	3	3	2	4	4	4	4	4	2	3	2	2	3
126	1	2	4	2	3	3	3	2	3	3	3	3	3	2	1	2	3	3
127	4	4	2	4	2	2	1	4	4	4	4	2	2	2	2	1	1	1
128	3	3	3	2	3	3	4	2	2	2	3	3	3	1	2	3	1	6
129	2	1	3	1	3	2	1	1	4	2	2	4	1	3	2	2	3	4
130	2	3	2	4	3	3	4	2	3	3	4	2	2	2	2	3	2	4
131	4	2	3	2	2	4	3	3	4	2	3	2	2	2	2	2	2	3
132	4	1	3	1	3	2	3	2	3	2	2	3	2	3	4	3	4	5
133	3	2	4	2	3	4	4	2	2	1	3	3	3	1	3	3	2	5
134	2	4	3	4	3	3	4	3	2	2	3	4	4	2	4	3	3	7
135	4	1	4	1	4	4	4	1	4	4	4	3	2	2	2	2	1	3
136	2	2	4	3	3	3	3	2	1	1	2	3	3	4	1	2	2	7
137	3	2	2	2	1	3	3	2	4	4	3	3	2	2	2	2	2	2
138	4	1	2	1	1	3	4	1	4	4	3	2	2	3	2	2	3	1
139	2	3	3	3	3	3	4	3	2	2	3	3	3	2	3	3	2	6
140	3	1	1	1	1	1	2	2	3	3	2	3	2	4	2	3	2	6
141	4	4	4	4	2	4	4	4	1	2	4	4	4	1	4	4	1	6
142	3	3	3	4	3	4	4	4	3	2	4	3	4	2	3	3	1	4
143	4	1	3	1	3	3	3	1	2	2	3	3	2	2	1	1	2	4
144	3	2	3	2	4	4	2	2	3	3	2	4	2	3	3	2	1	5
145	1	4	4	4	4	4	4	4	2	1	2	4	4	1	1	3	1	8
146	4	2	3	1	2	4	3	1	4	4	3	3	2	2	2	2	2	4
147	3	2	3	1	3	3	3	1	3	3	3	3	3	2	2	2	2	2
148	4	2	3	2	3	4	4	2	3	3	3	3	3	2	2	2	2	2
149	4	3	3	2	2	4	4	2	2	2	3	3	2	2	3	3	2	5
150	4	3	4	3	3	3	3	3	3	2	2	3	3	3	2	3	2	5
151	3	2	4	2	4	3	3	2	2	3	3	4	3	3	2	1	3	5
152	2	3	3	3	3	3	3	4	4	4	3	4	4	2	4	2	2	4
153	4	1	3	1	1	4	2	1	3	3	4	4	3	2	2	1	2	2
154	2	1	1	2	2	4	3	2	2	2	2	3	3	1	2	2	1	5
155	4	4	4	4	3	4	4	4	2	3	4	4	4	1	3	1	1	5
156	3	2	3	3	3	2	3	3	3	3	2	2	2	2	2	2	3	4
157	4	3	2	3	1	2	2	3	4	4	2	2	2	2	2	1	2	3
158	4	1	3	1	3	2	3	2	3	2	2	3	2	3	4	3	4	5
159	3	4	3	4	4	4	4	4	3	3	3	4	4	1	3	3	2	2
160	3	3	4	4	4	4	4	4	2	3	3	1	2	1	2	2	2	3
161	1	3	4	3	4	4	4	3	1	1	2	3	3	3	2	2	3	7
162	2	4	3	4	2	3	4	3	2	2	3	3	4	2	3	2	2	5
163	3	3	3	3	2	4	3	4	2	3	3	3	3	1	2	3	2	6
164	3	2	2	2	3	3	3	3	3	2	3	3	3	2	3	3	2	5
165	1	3	3	3	3	3	3	3	2	2	3	3	3	1	2	2	1	7
166	2	3	3	4	3	3	4	4	2	2	3	3	3	2	3	3	2	6
167	4	4	4	4	3	3	3	4	4	4	4	3	3	3	2	3	3	6
168	3	3	3	3	3	2	1	3	3	2	2	2	2	2	1	1	1	3
169	1	3	3	2	3	3	3	3	1	1	3	3	3	2	2	2	2	6
170	3	2	4	1	3	2	3	1	2	3	3	4	4	3	2	2	3	4
171	4	4	2	4	2	1	2	3	4	4	2	2	2	3	2	3	3	3
172	4	3	3	4	3	4	4	4	3	3	3	4	3	2	2	2	2	3

## Sheet: GPAQ
Number/Questions	Activity at work	P1.	P2.	P3.	P4.	P5.	P6.	Movement	P7.	P8.	P9.	Leisure activities	P10.	P11.	P12.	P13.	P14.	P15.	Sedentary activity	P16. (score in minutes)
001		NO	0	0	NO	0	0		YES	1	140		NO	0	0	NO	0	0		180
002		NO	0	0	NO	0	0		YES	1	120		NO	0	0	YES	5	30		300
003		NO	0	0	NO	0	0		YES	3	45		NO	0	0	NO	0	0		120
004		NO	0	0	NO	0	0		YES	3	30		NO	0	0	NO	0	0		120
005		NO	0	0	NO	0	0		YES	2	30		YES	1	30	YES	1	30		600
006		NO	0	0	NO	0	0		YES	5	60		NO	0	0	NO	0	0		120
007		NO	0	0	NO	0	0		NO	0	0		YES	4	60	YES	3	60		120
008		NO	0	0	YES	3	10		YES	5	30		NO	0	0	YES	5	30		120
009		NO	0	0	NO	0	0		YES	7	60		NO	0	0	YES	7	90		150
010		NO	0	0	NO	0	0		YES	2	30		YES	1	30	NO	0	0		480
011		NO	0	0	NO	0	0		YES	1	30		NO	0	0	NO	0	0		420
012		NO	0	0	NO	0	0		NO	0	0		NO	0	0	NO	0	0		600
013		NO	0	0	YES	1	30		YES	5	120		NO	0	0	NO	0	0		360
014		NO	0	0	YES	3	480		YES	4	60		YES	2	120	YES	2	120		240
015		NO	0	0	YES	5	120		NO	0	0		NO	0	0	YES	5	60		300
016		NO	0	0	YES	3	480		YES	4	30		NO	0	0	NO	0	0		240
017		NO	0	0	NO	0	0		YES	7	300		NO	0	0	YES	1	30		420
018		NO	0	0	NO	0	0		NO	0	0		NO	0	0	NO	0	0		360
019		YES	1	30	YES	2	30		YES	2	20		NO	0	0	NO	0	0		120
020		NO	0	0	NO	0	0		YES	2	60		YES	1	20	YES	1	25		300
021		NO	0	0	NO	0	0		NO	0	0		NO	0	0	YES	5	60		480
022		NO	0	0	NO	0	0		NO	0	0		NO	0	0	NO	0	0		480
023		NO	0	0	NO	0	0		NO	0	0		NO	0	0	NO	0	0		480
024		NO	0	0	NO	0	0		NO	0	0		NO	0	0	NO	0	0		480
025		NO	0	0	NO	0	0		NO	0	0		NO	0	0	NO	0	0		180
026		NO	0	0	NO	0	0		NO	0	0		YES	1	110	NO	0	0		120
027		NO	0	0	YES	3	120		YES	3	60		NO	0	0	NO	0	0		300
028		NO	0	0	NO	0	0		YES	5	60		NO	0	0	NO	0	0		300
029		NO	0	0	NO	0	0		NO	0	0		NO	0	0	YES	2	60		360
030		NO	0	0	YES	5	120		NO	0	0		NO	0	0	NO	0	0		420
031		NO	0	0	NO	0	0		YES	5	20		NO	0	0	NO	0	0		120
032		NO	0	0	NO	0	0		NO	0	0		NO	0	0	NO	0	0		360
033		NO	0	0	NO	0	0		NO	0	0		NO	0	0	NO	0	0		420
034		NO	0	0	YES	3	90		NO	0	0		NO	0	0	NO	0	0		360
035		NO	0	0	YES	5	480		NO	0	0		NO	0	0	NO	0	0		120
036		NO	0	0	YES	5	20		YES	3	10		NO	0	0	NO	0	0		180
037		NO	0	0	NO	0	0		NO	0	0		NO	0	0	NO	0	0		480
038		NO	0	0	NO	0	0		YES	3	120		NO	0	0	NO	0	0		240
039		NO	0	0	NO	0	0		YES	2	60		NO	0	0	NO	0	0		240
040		NO	0	0	NO	0	0		NO	0	0		YES	2	30	YES	3	30		360
041		YES	5	480	NO	0	0		YES	3	30		YES	2	30	NO	0	0		210
042		NO	0	0	NO	0	0		NO	0	0		NO	0	0	YES	3	45		540
043		NO	0	0	NO	0	0		YES	3	45		NO	0	0	NO	0	0		600
044		NO	0	0	NO	0	0		NO	0	0		NO	0	0	NO	0	0		120
045		YES	7	300	NO	0	0		NO	0	0		NO	0	0	NO	0	0		300
046		NO	0	0	NO	0	0		NO	0	0		NO	0	0	NO	0	0		600
047		YES	5	360	NO	0	0		NO	0	0		NO	0	0	NO	0	0		300
048		NO	0	0	NO	0	0		NO	0	0		NO	0	0	NO	0	0		300
049		NO	0	0	NO	0	0		YES	2	10		NO	0	0	YES	1	10		480
050		NO	0	0	YES	2	120		YES	3	60		YES	4	60	YES	1	60		180
051		NO	0	0	NO	0	0		NO	0	0		NO	0	0	NO	0	0		600
052		NO	0	0	NO	0	0		YES	6	60		NO	0	0	NO	0	0		425
053		NO	0	0	NO	0	0		YES	4	10		NO	0	0	YES	2	45		150
054		NO	0	0	NO	0	0		YES	7	30		NO	0	0	NO	0	0		180
055		NO	0	0	NO	0	0		YES	4	75		NO	0	0	NO	0	0		450
056		NO	0	0	NO	0	0		YES	5	60		NO	0	0	YES	4	90		240
057		NO	0	0	NO	0	0		YES	6	20		YES	2	45	NO	0	0		480
058		NO	0	0	NO	0	0		NO	0	0		NO	0	0	NO	0	0		480
059		NO	0	0	NO	0	0		NO	0	0		NO	0	0	NO	0	0		420
060		NO	0	0	NO	0	0		YES	3	45		NO	0	0	NO	0	0		420
061		NO	0	0	YES	6	30		NO	0	0		NO	0	0	NO	0	0		60
062		NO	0	0	NO	0	0		YES	5	30		NO	0	0	YES	6	90		600
063		NO	0	0	NO	0	0		NO	0	0		NO	0	0	NO	0	0		600
064		NO	0	0	NO	0	0		NO	0	0		NO	0	0	NO	0	0		360
065		NO	0	0	YES	5	180		NO	0	0		YES	2	90	NO	0	0		480
066		NO	0	0	NO	0	0		YES	5	20		NO	0	0	NO	0	0		120
067		NO	0	0	NO	0	0		YES	2	30		NO	0	0	YES	7	60		150
068		NO	0	0	NO	0	0		YES	7	30		NO	0	0	NO	0	0		360
069		YES	3	150	NO	0	0		YES	3	30		NO	0	0	NO	0	0		120
070		NO	0	0	NO	0	0		NO	0	0		NO	0	0	NO	0	0		300
071		NO	0	0	NO	0	0		NO	0	0		NO	0	0	NO	0	0		300
072		NO	0	0	NO	0	0		YES	5	30		NO	0	0	NO	0	0		120
073		NO	0	0	NO	0	0		NO	0	0		NO	0	0	NO	0	0		240
074		NO	0	0	NO	0	0		NO	0	0		NO	0	0	NO	0	0		600
075		NO	0	0	NO	0	0		NO	0	0		YES	3	120	NO	0	0		180
076		NO	0	0	NO	0	0		YES	1	30		YES	2	60	YES	2	60		420
077		NO	0	0	NO	0	0		NO	0	0		NO	0	0	NO	0	0		360
078		NO	0	0	YES	3	120		YES	1	30		YES	3	120	YES	1	180		90
079		NO	0	0	YES	4	30		NO	0	0		NO	0	0	NO	0	0		210
080		NO	0	0	NO	0	0		NO	0	0		NO	0	0	NO	0	0		480
081		NO	0	0	NO	0	0		NO	0	0		NO	0	0	NO	0	0		210
082		NO	0	0	NO	0	0		NO	0	0		YES	3	60	YES	3	60		180
083		NO	0	0	NO	0	0		NO	0	0		NO	0	0	YES	5	30		480
084		NO	0	0	NO	0	0		NO	0	0		NO	0	0	NO	0	0		600
085		NO	0	0	NO	0	0		NO	0	0		NO	0	0	NO	0	0		480
086		NO	0	0	NO	0	0		NO	0	0		NO	0	0	NO	0	0		450
087		NO	0	0	NO	0	0		NO	0	0		NO	0	0	NO	0	0		180
088		NO	0	0	NO	0	0		NO	0	0		NO	0	0	NO	0	0		360
089		NO	0	0	NO	0	0		YES	5	60		NO	0	0	NO	0	0		330
090		NO	0	0	YES	3	240		NO	0	0		NO	0	0	NO	0	0		360
091		NO	0	0	YES	5	10		YES	7	60		YES	5	30	YES	1	120		180
092		NO	0	0	NO	0	0		NO	0	0		NO	0	0	NO	0	0		720
093		NO	0	0	YES	2	30		NO	0	0		NO	0	0	NO	0	0		240
094		NO	0	0	NO	0	0		NO	0	0		NO	0	0	NO	0	0		600
095		NO	0	0	NO	0	0		NO	0	0		NO	0	0	NO	0	0		240
096		NO	0	0	NO	0	0		NO	0	0		NO	0	0	NO	0	0		150
097		NO	0	0	NO	0	0		YES	6	60		YES	1	60	YES	1	30		480
098		NO	0	0	NO	0	0		NO	0	0		NO	0	0	NO	0	0		270
099		NO	0	0	NO	0	0		YES	3	30		NO	0	0	YES	3	30		300
100		NO	0	0	NO	0	0		NO	0	0		YES	2	20	NO	0	0		300
101		NO	0	0	NO	0	0		NO	0	0		NO	0	0	NO	0	0		600
102		NO	0	0	NO	0	0		YES	2	30		YES	1	30	NO	0	0		300
103		NO	0	0	YES	5	60		NO	0	0		NO	0	0	NO	0	0		360
104		NO	0	0	NO	0	0		NO	0	0		NO	0	0	NO	0	0		480
105		NO	0	0	NO	0	0		NO	0	0		NO	0	0	NO	0	0		300
106		YES	4	60	YES	5	240		NO	0	0		NO	0	0	NO	0	0		300
107		NO	0	0	NO	0	0		NO	0	0		NO	0	0	NO	0	0		600
108		NO	0	0	NO	0	0		NO	0	0		NO	0	0	NO	0	0		600
109		NO	0	0	NO	0	0		YES	5	30		NO	0	0	NO	0	0		360
110		NO	0	0	YES	5	120		YES	4	30		NO	0	0	NO	0	0		300
111		NO	0	0	NO	0	0		NO	0	0		NO	0	0	NO	0	0		480
112		NO	0	0	NO	0	0		YES	5	40		NO	0	0	NO	0	0		480
113		NO	0	0	NO	0	0		NO	0	0		NO	0	0	NO	0	0		150
114		NO	0	0	YES	1	120		NO	0	0		NO	0	0	NO	0	0		300
115		NO	0	0	NO	3	180		YES	7	120		NO	0	0	YES	4	180		120
116		NO	0	0	NO	0	0		NO	0	0		NO	0	0	NO	0	0		450
117		NO	0	0	NO	0	0		YES	5	30		NO	0	0	YES	3	30		300
118		NO	0	0	NO	0	0		NO	0	0		NO	0	0	NO	0	0		600
119		NO	0	0	NO	0	0		YES	4	30		NO	0	0	NO	0	0		480
120		NO	0	0	NO	0	0		NO	0	0		NO	0	0	NO	0	0		600
121		NO	0	0	NO	0	0		NO	0	0		NO	0	0	NO	0	0		600
122		NO	0	0	YES	5	120		NO	0	0		NO	0	0	NO	0	0		480
123		NO	0	0	NO	0	0		YES	3	240		YES	3	180	NO	0	0		300
124		YES	5	60	NO	0	0		YES	5	30		NO	0	0	NO	0	0		210
125		NO	0	0	NO	0	0		NO	0	0		NO	0	0	NO	0	0		360
126		YES	5	30	NO	0	0		YES	5	30		NO	0	0	NO	0	0		300
127		NO	0	0	YES	5	120		YES	5	20		NO	0	0	NO	0	0		300
128		NO	0	0	NO	0	0		NO	0	0		NO	0	0	YES	2	60		420
129		YES	1	60	NO	0	0		YES	3	20		NO	0	0	NO	0	0		600
130		NO	0	0	NO	0	0		YES	7	60		NO	0	0	YES	3	60		480
131		NO	0	0	NO	0	0		YES	3	30		NO	0	0	YES	1	60		300
132		NO	0	0	YES	2	30		NO	0	0		NO	0	0	NO	0	0		720
133		NO	0	0	NO	0	0		NO	0	0		YES	3	45	NO	0	0		600
134		NO	0	0	YES	5	240		YES	6	120		NO	0	0	YES	6	120		60
135		NO	0	0	NO	0	0		NO	0	0		NO	0	0	YES	3	30		600
136		YES	3	30	NO	2	60		YES	5	30		NO	0	0	NO	0	0		360
137		NO	0	0	NO	0	0		NO	0	0		YES	3	60	YES	2	30		300
138		NO	0	0	NO	0	0		YES	3	20		NO	0	0	NO	0	0		600
139		YES	5	300	YES	2	120		YES	3	30		YES	3	30	YES	3	30		300
140		NO	0	0	YES	1	120		NO	0	0		NO	0	0	NO	0	0		600
141		NO	0	0	NO	0	0		NO	0	0		NO	0	0	NO	0	0		600
142		NO	0	0	NO	0	0		NO	0	0		NO	0	0	NO	0	0		600
143		NO	0	0	NO	0	0		YES	5	60		NO	0	0	NO	0	0		600
144		YES	4	65	YES	4	180		YES	4	30		NO	0	0	YES	5	210		210
145		NO	0	0	NO	0	0		NO	0	0		NO	0	0	NO	0	0		600
146		NO	0	0	NO	0	0		YES	5	30		NO	0	0	YES	2	30		300
147		NO	0	0	NO	0	0		YES	3	30		NO	0	0	NO	0	0		480
148		NO	0	0	NO	0	0		YES	5	45		NO	0	0	NO	0	0		480
149		NO	0	0	NO	0	0		YES	2	30		NO	0	0	NO	0	0		480
150		NO	0	0	NO	0	0		YES	3	45		NO	0	0	NO	0	0		540
151		NO	0	0	YES	1	30		YES	5	120		NO	0	0	NO	0	0		480
152		NO	3	30	YES	4	30		YES	4	120		YES	5	30	NO	0	0		420
153		NO	0	0	NO	0	0		YES	7	20		NO	0	0	YES	3	60		300
154		NO	3	90	NO	0	0		YES	7	180		NO	0	0	NO	0	0		180
155		NO	0	0	YES	1	60		YES	2	30		NO	0	0	NO	0	0		480
156		NO	0	0	NO	0	0		YES	5	60		NO	0	0	NO	0	0		120
157		NO	0	0	NO	0	0		NO	0	0		NO	0	0	NO	0	0		480
158		NO	0	0	YES	5	30		YES	2	30		NO	0	0	NO	0	0		480
159		NO	0	0	YES	3	30		YES	3	60		NO	0	0	NO	0	0		120
160		NO	0	0	NO	0	0		NO	0	0		NO	0	0	NO	0	0		390
161		YES	3	30	NO	0	0		YES	2	30		NO	0	0	NO	0	0		480
162		YES	5	180	YES	3	120		YES	7	120		NO	0	0	NO	0	0		180
163		NO	0	0	YES	5	240		YES	6	90		NO	0	0	NO	0	0		180
164		NO	0	0	YES	5	240		YES	5	240		NO	0	0	NO	0	0		240
165		NO	0	0	NO	0	0		YES	7	20		NO	0	0	NO	0	0		480
166		NO	0	0	NO	0	0		YES	4	60		NO	0	0	YES	2	120		420
167		YES	5	240	YES	5	120		NO	0	0		NO	0	0	NO	0	0		240
168		NO	0	0	NO	0	0		YES	3	50		NO	0	0	NO	0	0		480
169		NO	0	0	YES	5	60		NO	0	0		NO	0	0	YES	2	30		420
170		NO	0	0	NO	0	0		YES	5	20		NO	0	0	NO	0	0		480
171		NO	0	0	YES	3	60		YES	3	60		NO	0	0	YES	2	60		360
172		NO	0	0	NO	0	0		YES	5	60		NO	0	0	NIO	0	0		240

## Sheet: YFAS 2.0
Number/Questions	YFAS1	YFAS2	YFAS3	YFAS4	YFAS5	YFAS6	YFAS7	YFAS8	YFAS9	YFAS10	YFAS11	YFAS12	YFAS13	YFAS14	YFAS15	YFAS16	YFAS17	YFAS18	YFAS19	YFAS20	YFAS21	YFAS22	YFAS23	YFAS24	YFAS25	YFAS26	YFAS27	YFAS28	YFAS29	YFAS30	YFAS31	YFAS32	YFAS33	YFAS34	YFAS35
001	4	3	0	3	1	1	1	0	0	1	2	3	2	6	6	1	0	4	1	0	0	4	1	1	3	2	0	7	1	2	2	2	0	0	4
002	5	5	0	4	0	0	0	0	2	0	0	0	0	0	0	0	0	0	0	0	0	6	6	5	7	0	0	7	0	0	7	7	0	0	1
003	4	2	0	0	4	0	0	0	5	0	5	0	4	3	3	0	4	1	4	0	0	3	4	3	7	0	2	2	0	4	5	5	0	0	0
004	4	2	0	0	4	0	0	0	0	0	0	0	0	0	0	0	0	0	0	0	0	0	0	0	6	0	0	2	0	4	5	5	0	0	0
005	4	3	0	2	3	0	1	1	0	0	0	1	1	4	1	2	0	2	0	0	4	1	1	2	6	7	0	2	0	1	3	3	0	2	0
006	4	5	2	3	4	2	0	2	0	0	2	1	1	2	2	1	0	0	0	0	0	5	4	3	7	2	0	2	0	0	1	1	0	0	1
007	4	5	1	2	2	0	0	0	0	0	0	1	1	0	1	0	0	0	0	0	0	0	1	1	1	3	0	1	0	1	0	1	0	0	0
008	5	5	1	5	1	1	0	0	4	0	0	0	0	0	0	6	1	0	0	0	0	6	2	0	5	1	0	2	0	2	2	1	0	0	5
009	2	3	1	2	1	1	1	1	1	2	2	4	3	2	3	3	2	2	2	2	2	1	1	5	4	2	1	1	1	1	3	2	0	0	1
010	4	5	0	6	4	7	5	7	0	0	2	2	5	5	2	1	0	0	0	0	0	0	0	0	2	0	0	1	4	0	1	3	0	0	2
011	5	5	1	3	4	1	0	0	0	1	3	2	1	1	2	2	1	1	1	0	0	1	2	1	3	1	1	2	1	0	1	2	1	0	1
012	4	5	1	6	4	5	0	0	0	4	0	4	0	5	1	4	0	3	0	3	0	0	2	0	5	1	0	1	0	0	3	3	0	2	1
013	5	6	3	3	4	5	4	4	3	2	5	7	7	5	4	4	3	2	2	4	4	5	4	7	6	6	3	5	5	5	2	1	0	0	0
014	4	4	0	3	3	1	1	0	0	0	0	4	0	3	2	1	1	4	0	0	4	0	6	0	6	1	0	1	1	1	6	6	0	0	1
015	4	3	0	4	0	0	0	0	0	2	2	2	2	1	1	0	0	0	0	1	1	1	1	2	5	5	0	0	0	0	3	3	0	0	0
016	0	0	0	0	0	0	0	2	0	0	0	0	0	0	0	0	0	0	0	0	0	0	0	0	0	0	0	0	0	0	0	0	0	0	0
017	5	5	2	3	3	0	0	0	0	0	3	3	3	3	3	3	3	2	1	0	0	2	3	1	4	2	0	3	2	1	3	3	0	0	1
018	2	3	0	2	2	1	0	0	0	0	1	1	2	0	1	0	0	0	0	0	0	0	1	1	3	0	0	0	0	0	3	3	0	0	0
019	3	3	0	2	2	2	1	0	0	0	2	2	2	2	2	6	6	0	0	0	0	0	3	2	2	2	0	3	2	2	1	3	0	0	0
020	3	4	0	5	5	4	1	0	0	0	0	2	2	1	2	2	0	1	0	0	0	0	2	2	6	1	0	2	1	3	4	4	0	0	1
021	7	7	1	7	6	1	2	2	0	0	2	6	6	0	4	4	5	0	0	0	0	7	7	0	3	1	0	7	3	7	5	5	0	0	5
022	3	3	3	3	3	3	3	3	2	3	2	3	4	5	2	3	2	2	3	1	3	1	4	2	7	3	4	2	1	4	2	5	2	4	1
023	4	4	2	7	2	1	3	0	0	0	3	1	5	1	6	3	1	0	0	0	0	5	2	5	3	3	0	2	1	2	3	3	0	0	0
024	2	7	3	5	6	4	4	3	0	0	2	4	1	2	6	4	0	0	0	0	4	1	6	6	7	3	0	0	1	1	1	0	0	0	0
025	2	3	3	3	6	4	4	3	0	0	3	1	1	2	1	0	0	0	0	0	0	0	2	0	6	0	0	0	1	1	1	0	0	0	0
026	2	3	0	0	0	0	0	0	0	0	0	0	1	0	1	0	0	0	0	0	0	1	0	0	1	0	0	1	0	0	1	0	0	0	0
027	3	3	0	4	0	0	2	0	0	0	0	0	0	0	1	0	0	0	0	0	0	0	0	0	4	0	0	1	3	2	6	6	0	0	0
028	0	1	0	0	1	0	1	0	0	0	0	0	0	0	0	0	0	0	0	0	0	0	0	0	0	0	0	0	0	0	0	0	0	0	0
029	0	1	0	0	1	0	0	0	0	0	0	0	0	0	0	0	0	0	0	0	0	0	0	0	0	0	0	0	0	0	0	0	0	0	0
030	5	4	0	3	3	3	1	0	2	4	3	4	3	0	4	6	1	2	0	0	0	3	0	2	5	2	0	5	0	3	4	5	0	0	3
031	7	7	0	3	4	1	2	0	0	0	4	5	5	2	3	3	0	1	0	0	0	1	0	0	5	4	1	3	1	3	3	3	1	1	2
032	2	3	1	2	2	3	1	0	0	0	2	2	3	3	5	3	0	0	0	0	0	1	0	2	2	0	0	1	1	1	1	1	0	0	1
033	6	5	1	2	1	0	5	0	0	0	2	1	5	3	3	6	0	2	0	0	0	3	0	4	5	3	0	1	0	1	3	3	0	0	0
034	6	7	4	4	5	5	5	2	2	1	6	4	7	2	3	5	3	3	0	1	1	6	4	6	7	5	3	3	5	5	6	5	0	0	0
035	0	0	0	0	0	0	0	0	0	0	0	0	0	0	0	0	0	0	0	0	0	0	0	0	2	1	0	2	0	0	0	0	0	0	0
036	4	4	0	3	0	0	1	1	0	0	0	0	0	2	7	3	0	0	0	0	0	7	0	0	6	0	0	2	1	1	0	0	0	0	1
037	4	3	0	1	1	2	1	0	0	0	1	0	0	0	1	2	1	0	0	0	0	2	2	1	3	3	1	0	1	1	0	1	2	1	0
038	4	3	0	2	1	1	2	0	0	0	0	0	0	0	1	0	0	0	0	0	0	0	0	0	1	0	0	2	0	0	3	2	0	0	0
039	3	2	0	5	2	2	0	0	0	0	0	1	2	0	3	0	0	0	0	0	0	0	1	0	3	1	0	2	0	1	2	3	0	0	0
040	3	3	0	1	0	0	0	0	0	0	1	1	1	0	2	2	1	0	0	0	0	1	0	0	6	0	0	4	6	0	4	4	0	0	0
041	2	2	0	2	0	0	0	0	0	0	0	0	0	0	0	0	0	0	0	0	0	0	0	0	0	0	0	5	0	0	3	2	0	0	0
042	3	3	0	1	0	0	0	0	0	0	0	0	1	0	1	0	0	0	0	0	0	0	0	0	1	2	0	0	0	0	0	0	0	0	0
043	5	5	4	4	4	2	2	2	1	0	3	2	4	4	3	5	4	1	4	0	0	3	4	1	7	4	1	2	4	5	5	5	0	0	1
044	1	1	0	0	0	0	7	0	0	0	5	3	0	0	1	0	0	0	0	0	0	4	0	0	0	0	0	0	0	0	0	0	0	0	0
045	5	6	5	6	5	5	5	6	5	4	5	4	5	6	4	3	3	4	4	4	4	3	3	3	4	4	4	4	5	3	5	4	4	4	4
046	7	6	2	6	2	2	5	2	2	4	3	3	3	3	3	6	3	3	2	2	2	4	2	6	7	5	2	2	5	3	3	2	1	1	3
047	2	3	0	3	4	0	2	1	0	0	1	2	2	0	3	3	5	2	0	0	0	3	3	3	7	3	0	3	1	2	4	5	2	2	1
048	4	3	0	2	2	1	0	0	0	0	0	0	0	0	1	0	0	0	0	0	0	0	0	2	5	0	0	4	0	1	3	4	0	0	0
049	2	3	1	3	2	0	1	0	0	0	1	2	2	1	1	1	0	0	0	0	0	0	2	1	3	1	0	1	0	0	2	1	0	0	0
050	6	6	6	6	6	5	3	2	0	1	3	2	3	1	3	5	11	3	1	1	1	2	3	3	5	3	2	5	4	4	3	4	0	0	0
051	3	1	0	3	2	1	1	0	0	0	0	1	2	1	1	1	0	0	0	0	1	0	0	0	2	3	0	0	0	0	3	3	0	0	0
052	1	1	0	2	1	0	0	0	0	0	0	3	4	0	3	5	1	1	0	0	0	2	1	2	7	1	0	4	1	5	2	7	0	0	0
053	5	5	1	4	3	3	2	0	0	0	1	1	3	0	2	2	2	3	2	0	0	2	3	3	3	2	0	4	1	2	4	4	0	0	3
054	6	5	2	7	1	0	4	0	0	0	4	4	4	1	7	2	0	1	1	0	0	6	5	0	6	5	0	7	1	1	7	7	0	0	0
055	3	3	0	1	4	2	1	0	0	0	4	5	3	3	3	3	5	2	0	0	1	0	2	1	2	0	3	5	4	5	3	4	4	4	5
056	1	1	1	3	3	0	0	0	0	0	0	0	0	0	0	0	0	0	0	0	0	1	1	0	4	0	0	1	0	1	4	4	0	0	0
057	7	6	3	6	3	3	5	5	0	0	5	6	6	6	6	6	6	3	0	0	0	5	5	0	7	0	0	0	5	5	6	6	3	0	1
058	7	5	2	0	0	2	3	3	0	4	0	5	0	0	7	5	0	4	7	3	3	2	0	6	3	3	0	1	7	6	0	0	0	0	0
059	1	1	0	1	1	0	0	0	0	0	0	0	0	0	0	0	0	0	0	0	0	0	0	0	0	0	0	0	0	0	0	0	0	0	0
060	0	1	3	3	2	1	7	4	6	4	5	6	3	2	2	0	0	0	1	1	2	0	3	3	3	3	4	3	2	4	4	0	0	0	0
061	1	1	0	0	0	0	0	0	0	0	0	0	0	0	0	0	0	0	0	0	0	0	0	0	0	0	0	0	0	0	0	0	0	0	0
062	7	5	0	4	3	0	0	0	0	0	0	0	0	0	1	1	0	0	0	0	0	1	0	3	2	0	2	2	2	1	3	1	0	0	0
063	7	7	0	0	4	0	0	0	0	0	0	0	0	0	0	0	0	0	0	0	0	0	0	0	0	0	0	0	0	0	0	0	0	0	0
064	0	0	0	1	0	0	0	0	0	0	0	0	0	1	0	0	0	0	0	0	0	0	0	0	0	0	0	0	0	0	0	0	0	0	0
065	6	5	0	4	0	0	2	0	0	0	1	1	0	1	1	1	0	0	0	0	0	0	0	0	5	0	0	6	0	1	5	5	0	0	2
066	2	2	1	3	2	1	1	1	0	0	3	3	3	6	3	3	2	1	0	0	1	1	1	3	4	3	2	2	3	3	4	4	2	2	1
067	3	3	0	2	1	0	0	0	0	0	0	0	0	0	0	0	0	0	0	0	0	0	0	3	5	5	0	4	0	0	4	4	0	0	0
068	3	5	0	1	0	0	0	0	0	0	0	0	0	0	0	0	0	1	0	0	0	0	0	0	0	0	0	0	0	2	0	0	0	0	1
069	0	0	0	0	0	0	0	0	0	0	0	0	0	7	0	0	0	0	0	0	0	0	0	0	0	0	0	0	0	0	0	0	0	0	0
070	2	2	0	2	0	0	2	0	0	0	2	0	2	0	0	0	0	0	0	0	0	0	0	0	0	0	0	0	0	0	0	0	0	0	0
071	7	7	0	3	3	0	1	0	0	0	5	0	3	0	5	1	0	0	0	0	0	0	3	0	3	0	0	3	3	2	3	5	0	0	0
072	6	6	2	7	3	1	3	0	0	0	2	1	4	2	4	2	0	0	0	0	1	4	0	3	0	0	0	0	0	0	0	0	0	0	0
073	5	5	0	5	5	3	0	0	0	0	0	0	1	0	0	0	0	0	0	0	0	0	0	0	3	0	0	0	0	0	0	0	0	0	0
074	3	5	3	4	5	5	5	4	1	1	4	5	5	5	5	5	5	4	3	2	2	2	3	3	5	4	4	4	4	5	4	4	2	2	1
075	6	6	1	5	3	1	2	0	0	0	5	1	4	0	4	2	1	1	0	0	2	2	2	1	4	5	0	5	5	5	5	5	0	0	2
076	5	5	0	6	5	2	2	1	0	0	5	5	5	5	5	4	0	1	0	0	0	0	5	0	5	3	0	5	5	5	5	5	0	0	0
077	3	4	0	1	0	0	2	1	0	0	0	0	0	0	4	3	0	0	0	0	0	0	0	0	4	2	0	0	0	0	0	0	0	0	0
078	1	0	0	0	0	0	0	0	0	0	0	0	0	0	1	0	1	0	0	0	0	0	0	0	0	0	0	1	0	0	2	2	0	0	0
079	5	1	0	1	0	0	1	0	0	0	0	0	0	0	1	0	0	0	0	0	0	0	0	0	5	0	0	5	1	1	1	1	0	0	0
080	2	1	0	0	0	0	0	0	0	0	0	0	2	0	0	1	0	0	0	0	0	0	0	0	1	2	0	0	0	0	0	0	0	0	0
081	5	4	0	1	1	1	3	0	0	0	1	2	3	0	3	0	0	0	0	0	0	0	2	0	5	4	0	3	2	3	3	5	0	0	0
082	3	5	0	5	0	0	1	0	0	0	0	1	0	0	3	4	0	0	0	0	0	0	0	0	2	0	0	3	0	0	3	3	0	0	0
083	2	1	0	2	1	0	0	0	0	0	0	0	0	0	0	6	0	0	0	0	0	0	0	0	2	0	0	2	0	0	2	1	0	0	0
084	5	4	0	3	3	0	0	0	0	1	1	3	3	1	2	2	0	0	0	0	0	2	2	0	4	2	0	3	3	0	3	3	0	0	0
085	7	5	2	0	1	0	1	0	0	0	0	0	0	0	5	2	0	0	0	0	0	0	0	0	0	0	0	0	0	0	0	0	0	0	0
086	1	1	0	2	0	0	0	0	0	0	0	0	0	0	0	0	0	0	0	0	0	0	0	1	1	0	0	0	0	0	1	1	0	0	0
087	0	3	0	1	3	0	0	0	0	0	3	3	3	4	4	3	0	0	0	0	0	3	3	2	4	3	0	2	5	5	3	3	0	0	0
088	3	2	0	0	1	0	1	1	1	0	0	0	0	0	1	1	1	1	1	1	0	1	1	1	0	0	0	0	1	0	0	0	0	0	0
089	5	5	0	5	1	1	0	0	0	0	1	2	3	2	3	1	0	0	0	0	0	1	1	1	3	2	0	3	2	3	3	3	0	0	0
090	2	4	0	4	3	0	1	0	0	0	0	0	0	0	0	0	0	0	0	0	0	0	0	0	2	0	0	4	0	0	0	0	0	0	0
091	1	1	0	0	1	0	0	0	0	0	1	0	1	0	1	0	0	0	0	0	0	0	0	0	1	0	0	0	0	0	1	1	0	0	0
092	0	0	0	0	0	0	0	0	0	0	0	0	0	0	0	0	0	0	0	0	0	0	0	0	0	0	0	0	0	0	0	0	0	0	0
093	1	2	0	1	1	0	0	0	0	0	1	1	0	0	3	1	0	0	0	0	0	0	0	0	2	0	0	2	0	1	1	1	0	0	0
094	7	6	2	3	2	1	4	2	0	0	3	1	5	1	3	3	0	0	0	0	0	0	0	4	3	3	0	0	0	0	0	0	0	0	0
095	5	5	1	2	0	0	0	0	0	0	0	0	0	0	0	0	0	0	0	0	0	0	0	0	0	0	0	0	0	0	0	0	0	0	0
096	5	0	0	6	0	0	0	0	0	0	3	3	3	3	3	0	0	0	0	0	0	0	0	0	2	1	0	2	1	0	1	1	0	0	0
097	7	5	0	2	6	1	7	1	0	0	1	4	0	6	5	5	0	0	0	0	0	0	0	0	1	0	0	1	0	0	1	0	0	0	0
098	1	0	0	2	1	2	2	0	0	0	0	0	1	0	0	0	0	0	0	0	0	0	0	0	2	0	0	1	1	1	2	2	0	0	0
099	0	0	0	0	0	0	0	0	0	0	0	0	0	0	0	0	0	0	0	0	0	0	0	0	0	0	0	0	0	0	0	0	0	0	0
100	4	5	0	0	3	0	0	0	0	0	0	0	0	1	4	1	0	0	0	0	2	2	0	4	3	3	0	0	0	0	0	0	0	0	0
101	6	6	2	7	3	1	5	2	1	0	1	2	3	3	5	5	2	1	0	0	0	3	3	5	3	3	1	1	1	1	0	0	0	0	0
102	4	4	3	5	4	2	1	1	0	0	2	3	3	2	3	2	1	0	0	0	0	1	1	1	5	3	0	2	1	1	3	3	0	0	0
103	6	6	2	4	0	1	4	0	0	0	1	0	0	0	5	3	0	0	0	0	0	2	0	2	6	0	0	0	0	0	0	0	0	0	0
104	1	0	0	2	0	0	2	0	0	0	0	0	0	0	0	0	0	0	0	0	0	0	0	0	0	0	0	0	0	0	0	0	0	0	0
105	2	1	0	3	0	0	1	0	0	0	0	0	0	0	3	3	0	0	0	0	0	0	0	3	3	0	0	0	0	0	0	0	0	0	0
106	5	5	0	4	0	0	4	0	0	0	0	0	0	0	0	0	0	1	0	0	0	3	0	4	0	0	0	0	0	0	0	0	0	0	0
107	7	6	2	5	2	1	5	2	1	1	7	4	5	2	4	5	4	3	5	5	2	7	2	7	4	4	2	2	5	5	4	3	2	2	0
108	7	6	0	5	2	0	5	2	1	0	4	4	3	2	2	4	0	2	0	0	0	0	0	4	4	4	2	2	5	5	4	3	0	0	0
109	2	2	0	1	0	0	0	0	0	0	2	0	0	0	0	0	0	0	0	0	0	0	0	0	0	0	0	0	0	0	0	0	0	0	0
110	1	2	0	0	0	0	0	0	0	0	0	0	0	0	0	0	0	0	0	0	0	0	0	0	0	0	0	0	0	0	0	0	0	0	0
111	1	2	0	0	0	0	0	0	0	0	0	0	0	0	0	0	0	0	0	0	0	0	0	0	0	0	0	0	0	0	0	0	0	0	0
112	0	0	0	0	0	0	0	0	0	0	0	0	0	0	0	0	0	0	0	0	0	0	0	0	0	0	0	0	0	0	0	0	0	0	0
113	3	3	1	3	1	3	0	1	0	0	0	2	3	0	0	3	0	0	0	0	0	4	4	2	6	4	0	6	3	2	6	6	0	0	0
114	0	0	0	0	0	0	0	0	0	0	0	1	1	0	1	1	0	0	0	0	0	0	0	0	1	0	0	1	0	0	1	1	0	0	0
115	2	1	0	2	1	1	1	0	1	0	1	2	1	1	2	1	0	0	0	0	0	1	1	2	2	0	0	1	1	0	3	3	0	0	2
116	5	5	3	1	1	2	0	0	0	0	1	1	1	0	1	2	0	0	0	0	0	0	0	1	3	3	0	3	1	1	1	2	0	0	0
117	0	0	0	0	0	0	0	0	0	0	0	0	0	0	0	0	0	0	0	0	0	0	0	0	0	0	0	0	0	0	0	0	0	0	0
118	5	5	1	6	1	0	4	0	0	0	0	0	4	0	2	4	1	0	0	0	0	2	0	4	0	0	0	2	0	0	2	0	0	0	0
119	6	7	0	5	0	0	5	1	0	2	2	1	0	1	3	2	0	0	0	0	0	2	0	4	7	2	0	1	2	0	0	0	0	0	0
120	6	5	3	5	2	0	5	2	0	0	3	2	0	3	3	1	0	0	0	0	0	4	1	6	5	2	0	2	2	2	4	0	0	0	0
121	0	0	0	0	0	0	0	0	5	0	0	0	0	6	0	0	0	0	0	0	0	0	0	0	7	0	0	0	0	0	6	4	0	0	4
122	0	0	0	0	0	0	0	0	0	0	0	0	0	0	0	0	0	0	0	0	0	0	0	0	0	0	0	0	0	0	0	0	0	0	0
123	3	1	0	0	0	0	0	0	0	0	0	0	0	0	0	0	0	0	0	0	0	0	0	0	0	0	0	0	0	0	0	0	0	0	0
124	5	5	1	5	1	1	0	0	4	0	0	0	0	0	0	6	1	0	0	0	0	6	2	0	5	1	0	2	0	2	2	1	0	0	5
125	0	0	0	0	0	0	0	0	0	0	0	0	0	0	0	0	0	0	0	0	0	0	0	0	0	0	0	0	0	0	0	0	0	0	0
126	3	3	0	2	1	0	2	0	0	0	0	3	4	0	3	5	1	1	0	0	0	4	1	2	0	1	0	4	1	5	2	0	0	0	0
127	7	6	1	4	0	0	4	1	0	0	2	2	0	0	3	1	0	0	0	0	2	2	1	6	7	3	0	0	0	0	3	3	0	0	0
128	3	4	0	1	0	0	0	0	0	0	0	0	0	0	0	0	0	0	0	0	0	0	0	0	1	0	0	2	0	0	1	1	0	0	0
129	6	5	3	6	5	4	6	4	2	2	7	7	7	4	7	7	7	4	6	4	2	6	5	7	5	7	4	5	6	6	5	5	0	1	0
130	7	0	2	1	4	0	4	1	2	0	6	0	0	1	5	5	3	2	2	0	0	0	1	2	2	1	0	2	3	1	0	1	0	0	0
131	4	4	0	0	2	0	0	0	0	0	0	0	0	0	0	0	0	0	0	0	0	0	0	0	0	3	0	3	1	1	1	0	1	0	0
132	5	5	5	4	5	4	1	0	0	0	0	0	0	0	5	5	0	0	0	0	0	0	5	0	5	0	0	5	0	0	1	1	0	0	0
133	1	0	0	3	2	0	1	0	0	0	1	1	1	0	2	2	0	0	0	0	0	0	0	0	2	0	0	2	0	0	1	1	0	0	1
134	0	4	0	0	0	0	0	0	0	0	0	0	0	0	0	0	0	0	0	0	0	0	0	0	0	0	0	0	0	0	0	0	0	0	0
135	6	3	0	3	3	1	4	2	0	0	0	0	3	2	2	5	1	1	0	0	0	3	0	3	6	2	0	1	1	1	4	4	0	0	1
136	0	0	0	0	0	0	0	0	0	0	0	0	0	0	0	0	0	0	0	0	0	0	0	0	0	0	0	0	0	0	0	0	0	0	0
137	5	2	0	2	3	5	0	0	0	0	0	0	3	0	0	0	0	0	0	0	0	0	0	0	0	0	0	0	0	0	0	0	0	0	0
138	7	7	0	7	7	7	7	0	0	0	0	1	1	4	7	0	0	0	0	0	0	0	7	7	7	0	0	7	7	7	7	7	0	0	0
139	2	1	0	1	1	0	0	1	0	0	1	1	1	0	1	1	0	0	0	0	0	1	1	0	1	1	0	1	0	1	1	0	1	1	0
140	6	6	6	6	6	3	0	0	1	4	4	4	4	4	4	6	0	0	0	0	0	7	7	7	7	6	7	7	0	0	7	7	0	0	7
141	0	0	0	0	0	0	0	0	0	0	0	0	0	0	0	0	0	0	0	0	0	0	0	0	0	0	0	0	0	0	0	0	0	0	0
142	1	0	0	1	0	0	0	0	0	0	0	0	0	0	1	0	0	0	0	0	0	0	0	0	0	0	0	0	0	0	0	0	0	0	0
143	5	7	4	7	3	1	5	1	0	0	0	3	4	2	5	6	1	3	2	3	2	7	4	7	7	7	2	5	5	3	7	6	3	1	0
144	4	5	0	3	3	0	7	1	0	0	1	1	1	0	5	5	4	3	4	3	1	1	1	1	1	0	0	1	0	0	1	1	0	0	1
145	0	0	0	0	0	0	0	0	0	0	0	0	0	0	0	0	0	0	0	0	0	0	0	0	0	0	0	0	0	0	0	0	0	0	0
146	0	0	0	0	0	0	0	0	0	0	0	0	0	0	0	0	0	0	0	0	0	0	0	0	0	0	0	0	0	0	0	0	0	0	0
147	5	1	0	5	2	0	7	6	0	0	0	0	3	2	2	4	0	0	0	0	0	0	0	0	0	0	0	0	0	0	0	0	0	0	0
148	2	1	3	0	2	0	0	0	0	0	0	0	0	0	0	0	0	0	0	0	0	0	0	0	6	4	1	0	0	0	0	0	0	0	0
149	4	5	0	1	2	0	1	0	0	0	0	1	0	0	0	0	0	0	0	0	0	0	0	0	2	2	0	1	0	0	2	2	0	0	1
150	4	3	0	3	1	0	4	4	3	4	5	5	5	3	2	3	6	6	4	3	3	3	2	1	4	3	5	5	5	2	2	1	0	0	0
151	7	4	0	1	2	0	7	2	1	0	3	1	4	3	4	5	1	1	0	0	0	6	3	7	7	4	2	4	4	4	2	3	0	0	0
152	5	3	0	2	3	0	0	0	0	0	0	0	0	0	0	0	0	0	0	0	0	0	0	0	3	0	0	0	0	0	0	0	0	0	0
153	1	1	0	5	0	0	0	0	0	0	0	0	0	0	1	0	0	0	0	0	0	2	2	0	7	1	0	5	5	5	7	7	0	0	0
154	4	1	0	4	1	0	1	0	0	0	0	2	4	1	1	1	0	0	0	0	0	3	2	1	7	1	0	2	0	0	6	6	0	0	0
155	5	0	0	0	0	0	0	0	0	0	0	0	0	0	0	0	0	0	0	0	0	0	0	0	0	0	0	0	0	0	0	0	0	0	0
156	1	1	0	1	5	5	1	0	0	7	7	7	0	0	0	0	0	0	0	0	0	1	0	0	0	1	0	0	0	0	0	7	0	0	0
157	5	6	0	0	0	0	0	0	0	0	0	0	0	0	0	0	0	0	0	0	0	0	0	0	0	0	0	0	0	0	0	0	0	0	0
158	5	5	5	4	5	4	1	0	0	0	0	0	0	0	5	5	0	0	0	0	0	0	5	0	5	0	0	5	0	0	1	1	0	0	0
159	3	2	0	1	0	1	0	0	0	0	0	0	0	0	0	0	0	0	0	0	0	0	0	0	0	0	0	0	0	0	0	0	0	0	0
160	1	1	0	1	0	0	0	0	0	0	0	1	0	1	1	0	0	0	0	0	0	0	0	0	2	0	0	0	0	1	1	1	0	0	0
161	5	3	0	2	0	0	3	0	0	0	0	0	2	0	3	3	0	0	0	0	0	3	0	0	4	0	0	0	0	0	0	0	0	0	0
162	2	3	1	3	2	0	3	0	0	1	1	6	0	6	4	4	5	0	0	0	0	3	4	6	4	0	0	2	3	2	3	2	0	0	0
163	3	2	0	1	1	0	2	0	0	0	0	0	0	0	1	0	0	0	0	0	0	0	0	0	0	0	0	0	1	0	1	1	0	0	0
164	1	0	0	1	0	0	0	0	0	0	0	0	1	0	0	0	0	0	0	0	0	1	1	0	0	0	0	1	0	0	0	1	0	0	0
165	0	0	0	0	0	0	0	0	0	0	0	0	0	0	0	0	0	0	0	0	0	0	0	0	0	0	0	0	0	0	0	0	0	0	0
166	2	2	0	1	2	0	0	1	0	0	1	0	0	1	1	1	0	0	0	0	0	0	0	0	1	0	0	0	0	0	0	0	0	0	0
167	3	1	0	1	0	0	0	0	0	0	0	0	0	0	0	0	0	0	0	0	0	0	0	0	0	0	0	1	0	1	1	1	0	0	0
168	7	2	1	1	2	1	6	2	5	4	6	4	2	3	4	4	5	2	4	2	4	3	5	4	3	4	0	4	7	3	2	1	5	3	0
169	4	3	0	6	0	0	5	3	0	0	2	0	2	2	4	5	4	0	0	0	0	0	2	0	5	0	0	2	2	0	0	6	0	0	0
170	3	1	0	0	0	0	2	2	0	0	0	0	0	0	0	0	0	0	0	0	0	0	0	0	0	0	0	0	0	0	0	0	0	0	0
171	4	5	0	5	0	0	4	0	0	0	0	2	2	2	2	0	0	0	0	0	0	0	1	4	5	0	0	0	0	0	0	0	0	0	0
172	1	1	0	0	0	0	0	0	0	0	0	0	0	0	0	0	0	0	0	0	0	0	0	0	0	0	0	0	0	0	0	0	0	0	0
